# Supplementary material for: Age and sex patterns of premature mortality in India
Source: PubMed Central journal article supplement — BMJ Open. 2014 Aug 5;4(8):e005386. doi: 10.1136/bmjopen-2014-005386 (PMC4127933; doi:10.1136/bmjopen-2014-005386), 2014-08-05
Supplement: bmjopen-2014-005386.draft_revisions.pdf [file bmjopen-2014-005386.draft_revisions.pdf]

# BMJ Open

## Age and sex pattern of premature mortality in India

|                                 |                                                                                                                                                                     |
|---------------------------------|---------------------------------------------------------------------------------------------------------------------------------------------------------------------|
| Journal:                        | <i>BMJ Open</i>                                                                                                                                                     |
| Manuscript ID:                  | bmjopen-2014-005386                                                                                                                                                 |
| Article Type:                   | Research                                                                                                                                                            |
| Date Submitted by the Author:   | 02-Apr-2014                                                                                                                                                         |
| Complete List of Authors:       | Dubey, Manisha; International Institute for Population Sciences , MOHANTY, SANAJY; International Institute for Population Sciences, Department of Fertility Studies |
| <b>Primary Subject Heading</b>: | Public health                                                                                                                                                       |
| Secondary Subject Heading:      | Public health, Research methods, Health policy, Health informatics                                                                                                  |
| Keywords:                       | Public health < INFECTIOUS DISEASES, Coronary heart disease < CARDIOLOGY, PUBLIC HEALTH, Demography < TROPICAL MEDICINE                                             |
|                                 |                                                                                                                                                                     |

SCHOLARONE™  
Manuscripts

Peer Review Only

1  
2  
3 **Title: Age and sex pattern of premature mortality in India**  
4  
5  
6  
7  
8  
9  
10  
11  
12  
13  
14  
15  
16  
17  
18

19 **Authors: Manisha Dubey<sup>1</sup> and Sanjay K Mohanty<sup>2</sup>**  
20  
21  
22  
23  
24  
25  
26  
27

28 **Corresponding author:**

29 Manisha Dubey, International Institute for Population Sciences (IIPS), Govandi Station Road,  
30 Deonar, Mumbai-400088, India; Mobil-9757224808, Email: [manikvdlw@gmail.com](mailto:manikvdlw@gmail.com)  
31  
32  
33  
34  
35  
36

37 **Institutional Affiliation:**

38 <sup>1</sup> Research Scholar, International Institute for Population Sciences, Govandi Station Road,  
39 Deonar, Mumbai-400088, India; Mobil-9757224808, Email: [manikvdlw@gmail.com](mailto:manikvdlw@gmail.com),  
40 [manisha.iips@gmail.com](mailto:manisha.iips@gmail.com)

41 <sup>2</sup>Professor, Department of Fertility Studies, International Institute for Population Sciences,  
42 Govandi Station Road, Deonar, Mumbai-400088, India; Mobil-9969687529, Email:  
43 [sanjayiips@yahoo.co.in](mailto:sanjayiips@yahoo.co.in), [sanjay@iips.net](mailto:sanjay@iips.net)  
44  
45

46 **Keywords:** Premature mortality, YPLL, PYPLL, WYPLL, Causes of death  
47  
48

49 **Word count:** 3315  
50  
51  
52  
53  
54  
55  
56  
57  
58  
59  
60

## Abstract

**Background:** Demographic and epidemiological transition in India has resulted in large working age population and rise in non-communicable diseases at faster pace than predicted. Early onset of non-communicable diseases are primarily affecting the working age population those are premature and avoidable. Using data from multiple sources this paper examines the age and sex pattern of premature mortality in India.

**Methods:** The premature mortality is measured with a set of indices; years of potential life lost (YPLL), premature years of potential life lost (PYPLL) and working years of potential life lost (WYPLL). All the indices were standardised and their corresponding rates have been calculated for broad age groups from 1991 to 2011 and also by selected causes of death for 2002.

**Results:** During 1991-2011, the age-standardized rate of YPLL had declined from 310 to 235.2 for male and from 307 to 206 for females per 1000 population. The standardized PYPLL (per 1000 population in 0-65 age) has declined from 259.4 to 136.9 for males and from 257.6 to 115.2 for females during the same period. The standardized WYPLL has declined from 274.2 to 130.7 for males and from 294.8 to 90.6 for females. Though the age pattern of these indices suggests significant improvement in early childhood mortality, PYPLL and WYPLL both are maximally contributed by the age group 0-4 years among both male and female. Afterwards, it decline in the age group 5-14 years but again increases among adults e.g. 15-65 years. In 2002, the WYPLL due to cardiovascular diseases was 25.7 million among males and 14.7 million among female.

**Conclusion:** The increasing share of premature mortality among adults and slower pace of decline in overall premature mortality during 1991-2011 warrants the urgent need to devise strategies on prevention and treatment of non-communicable diseases to save premature deaths in India.

### **Strengths and limitations of this study:**

This is the first ever study that provides the standardised estimates of premature mortality (YPLL, PYPLL and WYPL) by age and sex in India over two decades. It also estimates the standardised indices by cause of death. However, the study has two main limitations. First, it could not provide the state level estimates of the indices as the data on cause of death was available only at national level. Second, the trends in cause specific estimates could not be carried out due to data constraints.

## Age and sex pattern of premature mortality in India

### Introduction

Prevention of premature deaths and improving the adult health is increasingly the major public health challenges in developing world. This is largely due to the demographic and epidemiological transition that has altered the level of mortality and disease pattern across the age groups [1, 2]. The Non-communicable Diseases (NCDs) are the leading cause of death and it is primarily affecting the working age group [3, 4]. Studies suggest that premature deaths and hospitalisation adversely affects economic growth [5-7]. Mahal [7] estimated one trillion rupees loss of GDP in 2004 due to Cardiovascular Disease (CVD) in India.

The concept of premature mortality was evolved to measure the increasing social and economic cost of mortality at younger age because the conventional measure such as crude death rate and age specific death rate does not quantify the extent of life years lost at early ages[8]. A number of measures are developed and used to quantify the extent of premature mortality. These includes preferably potential years of the life lost (PYLL), premature years of potential life lost (PYPLL), the working years of potential life lost (WYPLL) and the valued years of potential life lost (VYPL). Each of the method is a function of age at death and the number of deaths at that age [9]. However, they varied with respect to upper and lower limit and weight given to each age.

Romeder and McWhinnie [10]rank the major cause of premature mortality by focussing on PYLL in age group 1 and 70.The level, pattern and cause of adult mortality in selected developing countries has been estimated, also the YPLL using an age-weight of 85 years minus the age at death[11].The Organisation of Economic Cooperation and Development [12]measured premature mortality with the help of potential years of the life lost (PYLL) before age 70 years for its member nations. According to a report issued by the US General Accounting Office in 1996, “premature mortality is the best single proxy for reflecting differences in the health status of state’s populations”[13]. The potential years of life lost (PYLL) is the most commonly used indicator to quantify premature mortality. In 2009, the PYLL was 201 per 1000 males in Russian Federation (highest) followed by Newzland (89). The gender differentials are large, higher for male than females (71 per 1000 females in Russian Federation and 28 in Newzland). A study on the fall and rise in inequalities in

1  
2  
3 premature mortality(death before the age 65) in USA for 1960-2002 found that the premature  
4 mortality and infant mortality decreased for all income groups[14]. The expected years of life  
5 lost has been estimated to rank the leading cause of deaths in San Francisco [15]. Large  
6 health disparities between African American and other ethnic groups were found. Disparities  
7 in premature mortality between high and low income countries and found strong association  
8 of income and premature mortality in low income countries than high-income countries and  
9 the risk factors are different for each group [16].  
10  
11  
12  
13

14  
15  
16 The non-communicable diseases (NCDs) account for 62% of the total burden of foregone  
17 DALYs and 53% of total deaths in India.9.2 million productive life lost in India in 2000 due  
18 to CVD among 35-64 years age group were estimated and projected to 17.9 million by 2030  
19 [17]. The cardiovascular deaths (CVDs) was estimated as1.4 million (56.2% in 25-69 age  
20 group) in 2004 and projected at 2.1 million (45% in 25-69 age group) by 2021[18].The  
21 hospitalisation rate and outpatient visit due to NCDs rose from 32% to 40% and 22% to 35%,  
22 respectively, within a decade from 1995 to 2004 [19]. In this context it is necessary to  
23 understand the extent of deaths among working population in India.  
24  
25  
26  
27  
28  
29

30  
31 Like other developing countries, India is also experiencing rapid demographic and  
32 epidemiological transition. While the total fertility rate is close to replacement level, the life  
33 expectancy has reached to 64.6years for male and 67.7 years for female by 2008 [20]. There  
34 has been significant reduction of child mortality in last two decades. The share of child  
35 mortality to total deaths has declined from 35% in 1991 to 17% by 2011. However, the share  
36 of adult deaths (deaths between 15-59 years) is on the rise though the probability of death  
37 between 15-59 years has declined over time. The Non-communicable diseases are the leading  
38 cause of mortality and morbidity. In this context, this paper examines the age and sex pattern  
39 of premature mortality in India over last two decades (1991-2011). It also estimates the extent  
40 of premature mortality by selected causes of death for 2002. The paper has been  
41 conceptualised with following rationale. First, the on-going demographic and  
42 epidemiological transition in India has altered the disease pattern and also the social,  
43 psychological and economic costs associated with premature deaths are devastating. The  
44 NCDs are the leading cause of deaths which are more prevalent among adults. Hence  
45 prevention of these deaths must be a public health priority. Second, the onset of NCDs in  
46 India is 10-15 years earlier than that of developed countries. These deaths are primarily  
47 affecting the working age group which results into rise in premature mortality and the public  
48  
49  
50  
51  
52  
53  
54  
55  
56  
57  
58  
59  
60

1  
2  
3 health centres in India are not equipped enough to treat the NCDs. Third, though the  
4 premature mortality has been extensively studied in developed countries, there is no study  
5 that has estimated the level and trend of premature mortality in India. The quantification of  
6 premature mortality helps to identify the social and economic cost associated with mortality,  
7 ranks the disease burden and has greater policy relevance. In this context, this paper provides  
8 the numerical estimates on the premature deaths in India over time and by causes of death for  
9 broad age group.  
10  
11  
12  
13

### 14 15 16 **Data**

17 This paper uses data from multiple sources; the census of India, 1991, 2001 and 2011, the  
18 sample registration system (SRS), 1991-2011 and report on cause of death, 2001-03 [21-25].  
19 This paper used published data and does not have any ethical issues. This is an independent  
20 research and did not get any funding. The Indian census is the largest single source of  
21 information on different characteristics of the people of India. We have used the age and sex  
22 distribution of the population for 1991, 2001 and 2011 census and the intercensal population  
23 for 1996 and 2006. The age distribution of intercensal periods (1996 and 2006) are borrowed  
24 from SRS.  
25  
26  
27  
28  
29  
30  
31

32  
33 The data on causes of death is extremely useful for planning of health programmes and for  
34 planning evidence based interventionist strategies in the country. The special survey of deaths  
35 (SSD) was undertaken by SRS in early 2004-05) using an advanced form of verbal autopsy for  
36 the period 2001-03. The Office of the Registrar General, India (ORGI) has prepared this  
37 Report jointly with the Centre for Global Health Research (CGHR), St. Michael's Hospital,  
38 and University of Toronto [21]. The grouping for the Causes of Death is as per the World  
39 Health Organisation (WHO) guidelines. The SSD was implemented during 2004-05 covering  
40 all deaths from 2001-2003 in Sample Registration System (SRS) [21]. The causes of death  
41 have been determined using an advanced form of Verbal Autopsy called the "RHIME" or  
42 Representative, Re-sampled, Routine Household Interview of Mortality with Medical  
43 Evaluation method. The cases resulting into continuing disagreements were referred to a third  
44 physician to adjudicate the final ICD-10 code. We have used data on distribution of deaths by  
45 age, sex and cause from this report to estimate the premature mortality due to individual  
46 causes of death.  
47  
48  
49  
50  
51  
52  
53  
54  
55  
56  
57  
58  
59  
60

## Methodology

Three indices have been used to quantify the premature mortality in India as described below:

### a. Years of Potential Life Lost (YPLL)

The potential years of life lost (YPLL) is a summary measure of premature mortality that gives higher weight to deaths occurring at younger age. It involves estimating the average time a person would have lived had he or she not died prematurely[9]. The method used in this study is given by:

$$YPLL = \sum_{i=0}^{\infty} d_i * L_i \quad (1)$$

where  $L_i$  is the life expectancy at age  $i$ ,  $d_i$  is the number of deaths at age  $i$ .

The standardised YPLL and corresponding rates have been calculated as follows[10]:

$$\text{Standardized YPLL} = YPLL * \left(\frac{P_{i,r}}{N_r}\right) * \left(\frac{N}{P_i}\right) \quad (2)$$

where  $P_{i,r}$  is population in the  $i^{\text{th}}$  age group in the reference population (Kerala);

$N_r$  is the total reference population (Kerala)

$N$  is the total study population;

$P_i$  is the population in the  $i^{\text{th}}$  age group in the study population.

$$\text{Rate of YPLL} = \frac{\sum YPLL}{N} * 1000 \quad (3)$$

### b. Premature years of potential life lost (PYPLL)

PYPLL measures the loss of years of productive life due to death before a cut-off age.

Different age limit could be taken to define premature death, however many studies have considered death before age 65 years as premature death[9].

$$PYPLL = \sum_{i=0}^N d_i * (N - i) \quad (4)$$

where  $d_i$  is the number of deaths at age  $i$ ,

We have used 65 as the upper cut-off age.

$$\text{Standardized PYPLL} = PYPLL * \left(\frac{P_{i,r}}{N_r}\right) * \left(\frac{N}{P_i}\right) \quad (5)$$

Where  $P_{i,r}$  is population in the  $i^{\text{th}}$  age group in the reference population (taken as Kerala);

$N_r$  is the total reference population in age group 0 to 65 (taken as Kerala);

$N$  is the total study population in age group 0-65;

$P_i$  is the population in the  $i^{\text{th}}$  age group in the study population.

$$\text{Rate of PYPLL} = \frac{\sum PYPLL}{N} * 1000 \quad (6)$$

Where  $N$  is the total population in age group 0 to 65.

### c. Working years of potential life lost (WYPLL)

The WYPLL measures the working life years lost during “the working age period” in a population.

$$WYPLL = \sum_{i=0}^{W-1} d_i * (N - W) + \sum_{i=W}^N d_i * (N - i) \quad (7)$$

Where  $d_i$  is the number of deaths at age  $i$ ,

$N$  is the upper cut off age;

$W$  is the lower cut-off age.

In computing the WYPL, the lower limit of 14 and upper limit of 65 is taken.

$$\text{Standardized WYPLL} = WYPLL * \left(\frac{P_{i,r}}{N_r}\right) * \left(\frac{N}{P_i}\right) \quad (8)$$

Where  $P_{i,r}$  is population in the  $i^{\text{th}}$  age group in the reference population (taken as Kerala);

$N_r$  is the total reference population in age group 0 to 65 (taken as Kerala);

$N$  is the total study population in the age group 0 to 65;

$P_i$  is the population in the  $i^{\text{th}}$  age group in the study population.

$$\text{Rate of WYPLL} = \frac{\sum WYPLL}{N} * 1000 \quad (9)$$

Where  $N$  is the total study population in the age group 0 to 65 years.

### Cause specific indices of premature mortality

We have also computed the YPLL, PYPLL and WYPLL were calculated for selected causes of death using the above methods for 2002. The diseases specific deaths are taken from the distribution of death by cause, age and sex and taken from Report on Causes of Death, RGI, 2001-03.



## Results

Results are presented in two sections. Section 1 describes the level and trend of premature mortality by age and sex and section 2 presents the estimated years of premature deaths by causes of death.

### Indices of Premature Mortality, 1991-2011: YPLL, PYPLL and WYPLL

Table 1 presents the standardized YPLL in millions for a period of two decades (1991-2011) by broad age group and sex. During 1991-2011, the YPLL has increased from 134.1 million to 146.6 million among male while it has declined from 123.2 million to 107.9 million among females. The rate of YPLL has declined from 310 to 235.2 per 1000 population for males and from 306.9 to 206 for females in the same period. Though the overall decline in YPLL reflects the marked improvement in mortality in the population, it conceals large discrepancies in broad age group. The decline in YPLL was significant among younger age group, particularly among children while it has remained similar or increased among adults (15-64 years). Among children under five years of age, the YPLL has declined from 56.3 in 1991 to 35 by 2011 for male while among female it has declined from 53.1 to 36.3 among female in the same period. Among adults (in 15-64 age groups), the YPLL has increased during 1991-2011 for males in all the age group, for example, in 60-70 age group YPLL has increased from 13.4 million to 20 million and from 12.6 to 18.7 million in the 30-45 age group. The YPLL has increased from 22.5 million in 1991 to 28.2 million by 2011 in the 45-59 age group. Among adult females, the YPLL has declined in the age group 15-45 and increased in the age group 60-70. With respect to elderly, the rate of YPLL has declined from 10.5 in 1991 to 26.8 by 2011 for males and 11.5 to 27.4 for females.

**Table 1: Standardised years of potential life lost (YPLL) in million and rate of YPLL (per 1000 population), India**

| Age group    | 1991  |        | 1996  |        | 2001 |        | 2006  |        | 2011  |        |
|--------------|-------|--------|-------|--------|------|--------|-------|--------|-------|--------|
|              | Male  | Female | Male  | Female | Male | Female | Male  | Female | Male  | Female |
| 0-4          | 56.3  | 53.1   | 50.2  | 48     | 62.3 | 60.4   | 45    | 41.5   | 35    | 36.3   |
| 5-14         | 7.8   | 7.9    | 7.9   | 8.3    | 7.3  | 7      | 7.2   | 6.8    | 5.6   | 5.0    |
| 15-29        | 10.9  | 13.2   | 11.3  | 13     | 13.1 | 14.7   | 13.1  | 12.9   | 12.2  | 11.2   |
| 30-45        | 12.6  | 11.9   | 14.4  | 12.5   | 17.4 | 13.6   | 18.2  | 12.5   | 18.7  | 10.6   |
| 45-59        | 22.5  | 14.9   | 24.6  | 17.2   | 28.1 | 18.7   | 26.5  | 16.7   | 28.2  | 16.9   |
| 60-70        | 13.4  | 10.8   | 17.1  | 13.5   | 18.4 | 14.6   | 18.6  | 15     | 20    | 15.1   |
| 70+          | 10.5  | 11.5   | 20.2  | 23     | 18.4 | 12.4   | 23.8  | 50.5   | 26.8  | 30.7   |
| <b>Total</b> | 134.1 | 123.2  | 145.7 | 135.3  | 165  | 141.3  | 152.5 | 155.8  | 146.6 | 107.9  |
| <b>Rate</b>  | 310   | 306.9  | 302.8 | 302.4  | 311  | 285.4  | 264.6 | 288.8  | 235.2 | 206    |

Table 2 provides the premature years of potential life lost (PYPLL) by age and sex in last two decade. The PYPLL fixes an upper limit to which individual are expected to survive and

measures the loss of years of productive life due to death before a selected cut-off age. During 1991-2011, the estimated PYPLL for male has declined from 107.7 to 80.9 million while that of females has declined from 99.1 to 63.8 million. The rate of PYPLL among male has declined from 259.4 in 1991 to 224.2 in 2001 and further to 136.9 by 2011. Among females, the rate of PYPLL has declined from 257.6 in 1991 to 212.9 in 2001 and 115.2 in 2011. The decline in PYPLL is faster among females compared to males. The differentials in PYPLL by age groups suggest that the decline is largely contributed by younger age group, particularly children under five years of age. During 1991-2011, the YPLL among children under five years of age has declined from 63.8 million years to 34.9 million years for male and from 60.1 million to 34.5 million years for females. The decline was secular for both male and females. On the other hand, in age group (15-65), the PYPLL has declined for females but not for males. The PYPLL for males in the age group 30-45 has increased from 10.8 million years to 14.2 million years and that for 45-59 it has increased from 13.6 million to 14.4 million years. Much of the gain in PYPLL was due to improvement in younger ages (below age 15 years and less at adult ages. In all the years studied, the PYPLL among male was highest in 0-4 age group followed by age group 45-59 years. Similarly for females the PYPLL was highest in 0-4 age group followed by 15-29 age group. While declining in PYPLL among children is a good sign, the increase in these indices among adult in the prime working age group is a concern. This is possibly due to increase in non-communicable diseases that are largely affecting the prime working age groups.

**Table 2: Premature years of potential life lost (PYPLL) in million and rate of PYPLL (per 1000 population), India**

| Age group | 1991  |        | 1996  |        | 2001  |        | 2006 |        | 2011  |        |
|-----------|-------|--------|-------|--------|-------|--------|------|--------|-------|--------|
|           | Male  | Female | Male  | Female | Male  | Female | Male | Female | Male  | Female |
| 0-4       | 63.8  | 60.1   | 54    | 51.2   | 65.5  | 61.9   | 46.1 | 41.1   | 34.9  | 34.5   |
| 5-14      | 7.8   | 7.7    | 7.5   | 7.7    | 6.7   | 6.4    | 6.7  | 6      | 5.1   | 4.3    |
| 15-29     | 10.4  | 12.2   | 10.2  | 11.3   | 11.7  | 12.3   | 11.5 | 10.7   | 10.5  | 9.0    |
| 30-45     | 10.8  | 9.6    | 11.6  | 9.4    | 13.6  | 9.9    | 14   | 8.9    | 14.2  | 7.3    |
| 45-59     | 13.6  | 8.5    | 13.4  | 8.7    | 14.5  | 8.8    | 13.7 | 7.8    | 14.4  | 7.6    |
| 60-65     | 1.3   | 0.9    | 1.6   | 1.1    | 1.4   | 1      | 1.6  | 1.1    | 1.6   | 1.0    |
| Total     | 107.7 | 99.1   | 98.3  | 89.4   | 113.6 | 100.1  | 93.6 | 75.5   | 80.9  | 63.8   |
| Rate      | 259.4 | 257.6  | 212.6 | 208.8  | 224.2 | 212.9  | 170  | 147    | 136.9 | 115.2  |

Table 3 presents the working years of potential life lost (WYPLL) by age and sex for last two decades. The WYPLL gives a higher weightage to working age population. During 1991-2011, the WYPLL has declined from 113.84 million to 77.2 million among male and from 113 million to 45 million among females. The rate of WYPLL has declined from 274.2 in 1991 to 130.7 per 100 for males. Among females, the rate of WYPLL has declined from

294.8 in 1991 to 90.6 in 2011. Distribution of WYPLL by age over the period of time shows similar pattern as that of YPLL. Among females, the WYPLL has declined over all age group while for males it has declined only for younger age group. Among males aged 30-45 years, the WYPLL has increased from 9 million years in 1991 to 13.1 million years by 2011. The WYPLL was higher among females compared to males at all age group. The standardisation of WYPLL does not change the gradient across age and sex over the period of time but level has changed.

**Table 3: Working years of potential life lost (WYPLL) in million and rate of WYPLL (per 1000 population), India**

| Age group    | 1991         |            | 1996         |           | 2001         |            | 2006        |           | 2011        |           |
|--------------|--------------|------------|--------------|-----------|--------------|------------|-------------|-----------|-------------|-----------|
|              | Male         | Female     | Male         | Female    | Male         | Female     | Male        | Female    | Male        | Female    |
| 0-4          | 73.4         | 76.9       | 61.3         | 63        | 72.3         | 74.8       | 47.9        | 46        | 34          | 36.4      |
| 5-14         | 10.3         | 11.4       | 9.8          | 10.9      | 8.7          | 8.9        | 8.0         | 7.8       | 5.7         | 5.3       |
| 15-29        | 8.7          | 10         | 8.5          | 9.3       | 10.0         | 10.2       | 10.2        | 9.3       | 9.7         | 8.1       |
| 30-45        | 9.0          | 7.7        | 9.7          | 7.8       | 11.6         | 8.3        | 12.4        | 7.7       | 13.1        | 6.5       |
| 45-59        | 11.4         | 6.8        | 11.3         | 7.1       | 12.4         | 7.2        | 12.2        | 6.8       | 13.2        | 6.8       |
| 60-65        | 1.1          | 0.8        | 1.4          | 0.9       | 1.2          | 0.8        | 1.4         | 1.0       | 1.5         | 0.9       |
| <b>Total</b> | <b>113.8</b> | <b>113</b> | <b>102.2</b> | <b>99</b> | <b>116.3</b> | <b>110</b> | <b>92.1</b> | <b>78</b> | <b>77.2</b> | <b>45</b> |
| <b>Rate</b>  | 274.2        | 294.8      | 220.9        | 231.5     | 229.6        | 234.3      | 167.3       | 152.8     | 130.7       | 90.6      |

#### YPLL, PYPLL and WYPLL by causes of death

Table 4 and figure 1, 2 and 3 presents the indices of premature mortality by causes of death for male and female. Given the increase in adult mortality, we have taken top nine causes of death among adults and computed the indices of premature mortality YPLL, PYPLL and WYPLL. These indices were limited to the year 2002 because the causes of death data were available only for this period. Among the nine leading causes of death, CVD account for maximum loss in YPLL and WYPLL.

The WYPLL among males was 25.7 million due to CVDS followed by 12.1 million due to Tuberculosis and 11.5 million due to Diarrheal diseases. The rate of WYPLL among males was also maximum for CVDs (49.6) followed by Tuberculosis (23.3) and diarrheal diseases (22.2). Similarly, for females, the WYPLL was highest for CVDs (14.7 million) followed by Diarrheal diseases (14.1) and malignant and other neoplasms (8.5). Among males, the YPLL was highest for CVDs (20.7) followed by diarrheal diseases (11.6) and Tuberculosis (9). For females, the YPLL was highest for CVDs (16.8) followed by diarrheal diseases (8.9) and Respiratory diseases (8.1). In terms of PYPLL, among males, the rate was highest for diarrheal diseases (9.1) followed by CVDs (7.6) and accidents (6.6). In case of females also, the rate of PYPLL was highest due to diarrheal diseases (11) followed by CVD (4.5) and

accidents (4.2). The corresponding rate of the YPLL, PYPLL and WYPLL shows the same trend for the given causes of deaths.

**Table 4: Rate and absolute number of YPLL, PYPLL and WYPLL by cause, India,2002**

| Causes of death               | Rate (per 1000 population) |        |       |        |       |        | Absolute number (million) |        |       |        |       |        |
|-------------------------------|----------------------------|--------|-------|--------|-------|--------|---------------------------|--------|-------|--------|-------|--------|
|                               | YPLL                       |        | PYPLL |        | WYPLL |        | YPLL                      |        | PYPLL |        | WYPLL |        |
|                               | Male                       | Female | Male  | Female | Male  | Female | Male                      | Female | Male  | Female | Male  | Female |
| Tuberculosis                  | 16.7                       | 13     | 9.7   | 7.7    | 23.3  | 14.2   | 9                         | 6.6    | 5     | 3.7    | 12.1  | 6.8    |
| Diarrheal diseases            | 21.4                       | 17.6   | 17.6  | 23.0   | 22.2  | 29.4   | 11.6                      | 8.9    | 9.1   | 11.0   | 11.5  | 14.1   |
| Malaria                       | 7.9                        | 7.8    | 5.9   | 7.2    | 8.8   | 10.4   | 4.3                       | 4      | 3.1   | 3.5    | 4.6   | 5      |
| Malignant and other neoplasms | 11.9                       | 14.6   | 6.2   | 7.1    | 16.4  | 17.8   | 6.4                       | 7.3    | 3.2   | 3.4    | 8.5   | 8.5    |
| CVD                           | 38.2                       | 33.3   | 14.6  | 9.5    | 49.6  | 30.7   | 20.7                      | 16.8   | 7.6   | 4.5    | 25.7  | 14.7   |
| Respiratory diseases          | 15.5                       | 16     | 4     | 3.3    | 18.3  | 13.5   | 8.4                       | 8.1    | 2.1   | 1.6    | 9.5   | 6.5    |
| Digestive diseases            | 9.7                        | 5.9    | 5.9   | 3.8    | 13.2  | 6.9    | 5.2                       | 3      | 3.1   | 1.8    | 6.9   | 3.3    |
| Unintentional injuries: Other | 16.1                       | 10.4   | 12.7  | 8.8    | 17.9  | 12.3   | 8.7                       | 5.2    | 6.6   | 4.2    | 9.3   | 5.9    |
| Accidents                     |                            |        |       |        |       |        |                           |        |       |        |       |        |
| Intentional injuries: Suicide | 7.3                        | 7.3    | 5.8   | 5.8    | 8.6   | 7.1    | 3.9                       | 3.7    | 3     | 2.8    | 4.5   | 3.4    |

Figure 4 and 5 depicts the age pattern of WYPLL for top three causes of death among male and female respectively. It is clear from both the figures that the Diarrheal diseases accounts for majority of the years lost among children (0-14 years) whereas CVD accounts for the highest life years lost among adults and old population. The adult population is affected by both communicable and non-communicable diseases. For example, among males, CVD and Tuberculosis both are remarkably high in the adult ages. Similarly, among adult females, CVD and Malignant and other neoplasms are leading causes of premature mortality. Hence, the adults of India are facing the dual burden of diseases which leads to the increase in premature mortality and lowering their health status.

### Conclusion

The concept of premature mortality has been used as an important measure of health status and a guide for health policies. Though the overall premature mortality indices and their rates have declined over time, the age pattern of YPLL, PYPLL and WYPLL reflects increased in premature mortality among male adults and older population. The decline in premature mortality is largely due to improvement in mortality in the younger age group e.g. 0-14 years. Males are experiencing more years of life lost than females. The indices have shown declining trend for adult females but has increased for males during 1991-2011. Analysis by causes of death depicts that there are certain diseases which remarkably accounts for more years of life lost than others. YPLL was highest due to CVD followed by Diarrheal diseases and Tuberculosis and Respiratory diseases for both male and female. Diarrheal diseases

1  
2  
3 accounts for highest loss in PYPLL followed by CVD and Accidents for both sex. The CVD  
4 accounts for highest loss in WYPLL both male and female followed by Tuberculosis and  
5 Diarrheal diseases for males and Diarrheal diseases and Malignant and other neoplasm for  
6 females. As most of the CVD deaths are premature and affecting the prime working age  
7 groups, it is time to invest and devise strategies to combat the non-communicable diseases  
8 particularly those are avoidable in working age groups. Diarrheal diseases, Tuberculosis and  
9 Malignant and other neoplasm are the other treats to young population which are  
10 communicable in nature. The dual burden of diseases on India is the root cause of poor health  
11 status of the population as signified by the indices of premature mortality. Therefore, the  
12 increasing share of premature mortality among adults and slower pace of decline in overall  
13 premature mortality during 1991-2011 warrants the urgent need to devise strategies to combat  
14 the dual burden of diseases and save premature deaths in India.  
15  
16  
17  
18  
19  
20  
21  
22  
23

24  
25 Though many new indices have been developed to measure the premature mortality like  
26 DALY (Disability adjusted life years), HALY (Health adjusted life years), YLL (Years of life  
27 lost) etc., these are based on a number of assumptions and suffers from data limitations in  
28 Indian context. On the other hand, the YPLL, PYPLL and WYPLL are simple to compute  
29 and capture the premature mortality as it is based on fewer assumptions and data input.  
30  
31  
32  
33  
34

### 35 Summary box

#### 37 What is already known on this object?

38  
39  
40 The demographic and epidemiological transition in India has resulted increase in non-  
41 communicable diseases across socio-economic groups and space. Studies suggest increase  
42 in premature mortality in prime working age group. A number of indices were devised to  
43 measure the extent of premature mortality; Years of life lost, Potential years of life lost,  
44 Working years of life lost, Valued years of life lost, Years of life lost and deaths among  
45 persons under age 65 etc. Though a number of indices were developed to measure the  
46 extent of premature mortality, these were limited to developed countries.  
47  
48

#### 50 What does this study add?

51  
52  
53 This study adds to the available literature on premature mortality by providing the  
54 standardised estimates of premature mortality by age and sex in India over two decades. It  
55 also suggests that the premature mortality is on rise among men in prime working age  
56 group. The cardiovascular disease is the leading cause of premature mortality followed by  
57 diarrheal diseases.  
58  
59  
60

**Author's Contribution:** MD conceptualised and prepared tables. MD and SKM prepared analytical plan and drafted the paper.

**Data sharing:** No additional data available.

**Competing Interests:** None

## References

- 1 Joshi R, Cardona M, Iyengar S, *et al.* Chronic diseases now a leading cause of death in rural India--mortality data from the Andhra Pradesh Rural Health Initiative. *International journal of epidemiology* 2006;**35**:1522-9.
- 2 Quigley MA. Commentary: shifting burden of disease--epidemiological transition in India. *International journal of epidemiology* 2006;**35**:1530-1.
- 3 Upadhyay RP. An overview of the burden of non-communicable diseases in India. *Iranian journal of public health* 2012;**41**:1-8.
- 4 Goyal A, Yusuf S. The burden of cardiovascular disease in the Indian subcontinent. *The Indian journal of medical research* 2006;**124**:235-44.
- 5 Bloom DE, Canning D. Health and Economic Growth: Reconciling the Micro and Macro Evidence. *CDDRL WORKING PAPERS*. Stanford: Stanford University 2005.
- 6 Bloom DE, Canning D, Sevilla J. The Effect of Health on Economic Growth: A Production Function Approach. *World Development* 2004;**32**:1-13.
- 7 Mahal A. The poor and health service use in India. *Health, Nutrition and Population (HNP) Discussion Paper*. The World Bank: Washington, DC 2001.
- 8 Dempsey M. Decline in tuberculosis: the death rate fails to tell the entire story. *Am Rev Tuberculosis* 1947;**56**:157-64.
- 9 Gardner JW, Sanborn JS. Years of potential life lost (YPLL)--what does it measure? *Epidemiology (Cambridge, Mass)* 1990;**1**:322-9.
- 10 Romeder JM, McWhinnie JR. Potential years of life lost between ages 1 and 70: an indicator of premature mortality for health planning. *International journal of epidemiology* 1977;**6**:143-51.
- 11 Murray CJL, Yang G, Qiao X. Adult mortality: levels patterns and causes. In: DT J, RG F, MW M, eds. *The Health of Adults in the Developing World*. New York: Oxford University Press for the World Bank 1992.
- 12 OECD. Premature mortality. *Health at a Glance 2011: OECD Indicators*. OECD Publishing: Organisation of Economic Cooperation and Development 2011.
- 13 Scanlon WJ. A Health Status Indicator for Targeting Federal Aid to States. In: Fastrup J, ed. *Report to the Chairman, Committee on Labor and Human Resources, US Senate*. USA: United States General Accounting Office 1996.
- 14 Krieger N, Rehkopf DH, Chen JT, *et al.* The Fall and Rise of US Inequities in Premature Mortality: 1960–2002. *PLoS Med* 2008;**5**:e46.
- 15 Aragon TJ, Lichtensztajn DY, Katcher BS, *et al.* Calculating expected years of life lost for assessing local ethnic disparities in causes of premature death. *BMC public health* 2008;**8**:116.
- 16 Cheng ER, Kindig DA. Disparities in Premature Mortality Between High- and Low-Income US Counties. *Prev Chronic Dis* 2012;**9**.

- 1  
2  
3 17 K Srinath Reddy BS, Cherian Varghese, and Anbumani Ramadoss. Responding to the  
4 threat of chronic diseases in India. *Lancet* 2005;**366**:1744-9.  
5 18 Srivastava A, Mohanty SK. Age and sex pattern of cardiovascular mortality,  
6 hospitalisation and associated cost in India. *PloS one* 2013;**8**:e62134.  
7 19 JS Thakur SP, Charu C. Garg, Shanthi Mendis and Nata Menabde. Social and  
8 Economic Implications of Noncommunicable diseases in India. *Indian Journal of Community*  
9 *Medicine* 2011;**36(Suppl1)**:13-22.  
10 20 RGI. SRS Based Abridged Life Tables 2003-07 to 2006-10 In: General R, ed. *SRS*  
11 *Analytical Studies*. New Delhi: Registrar General & Census Commissioner 2012.  
12 21 RGI. Report on Cause of Death in India 2001-2003. Office of the Registrar General of  
13 India 2009.  
14 22 Census. Census of India 2011. New Delhi: Registrar General & Census  
15 Commissioner. 2011.  
16 23 Census. Census of India 2001. New Delhi: Registrar General & Census  
17 Commissioner. 2001.  
18 24 Census. Census of India 1991. New Delhi: Registrar General & Census  
19 Commissioner. 1991.  
20 25 RGI. Sample Registration System Statistical Report (for the year 1991-2011). New  
21 Delhi: Office of The Registrar General, Ministry of Home Affairs, Government of India  
22  
23  
24  
25  
26  
27  
28  
29  
30  
31  
32  
33  
34  
35  
36  
37  
38  
39  
40  
41  
42  
43  
44  
45  
46  
47  
48  
49  
50  
51  
52  
53  
54  
55  
56  
57  
58  
59  
60

1  
2  
3  
4  
5  
6  
7  
8  
9  
10  
11  
12  
13  
14  
15  
16  
17  
18  
19  
20  
21  
22  
23  
24  
25  
26  
27  
28  
29  
30  
31  
32  
33  
34  
35  
36  
37  
38  
39  
40  
41  
42  
43  
44  
45  
46  
47  
48  
49  
50  
51  
52  
53  
54  
55  
56  
57  
58  
59  
60

Figure 1: YPLL (in million) for top nine causes of death among adult by sex, India, 2002

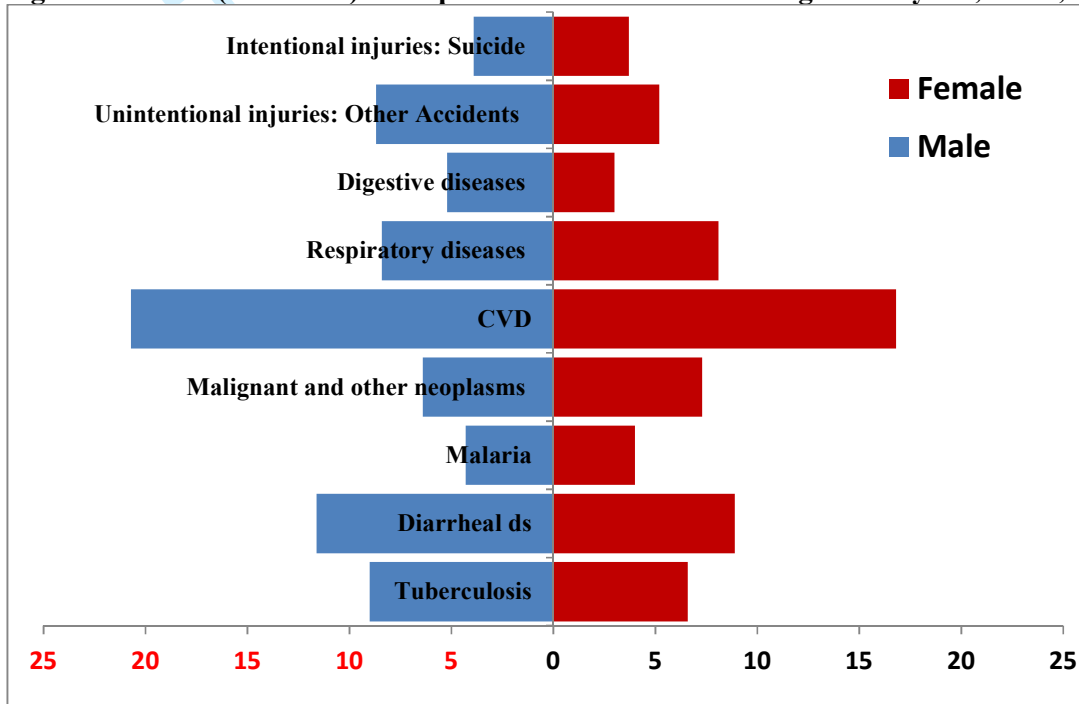

Figure 2: PYPLL (in million) for top nine causes of death among adult by sex, India, 2002



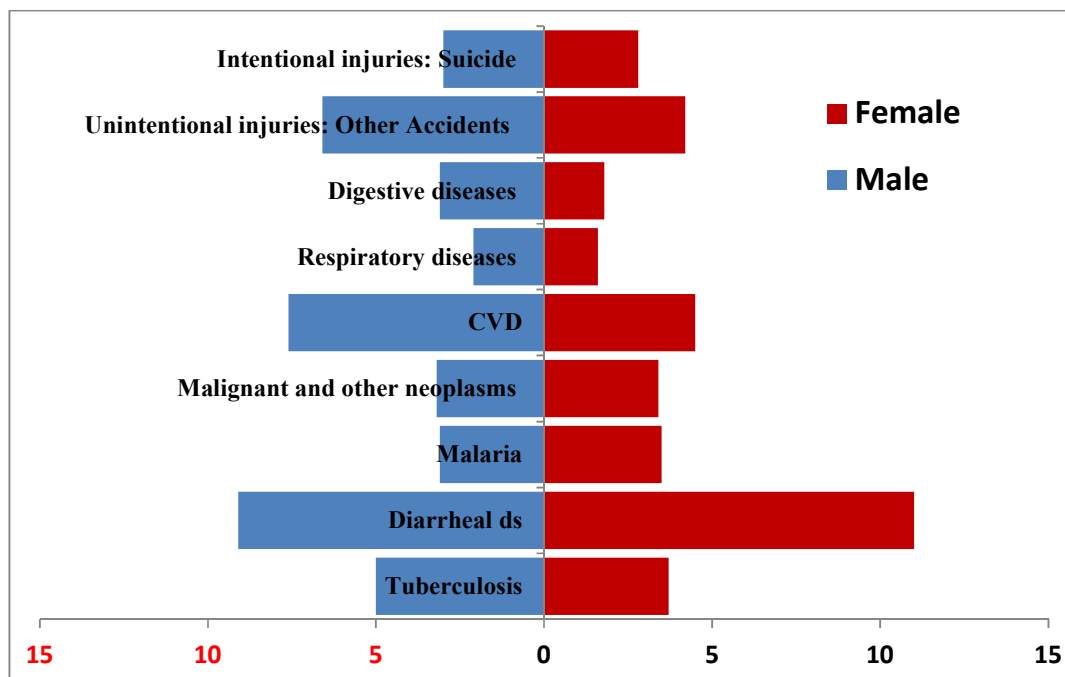

Figure 3: WYPLL (in million) for top nine causes of death among adults by sex, India, 2002

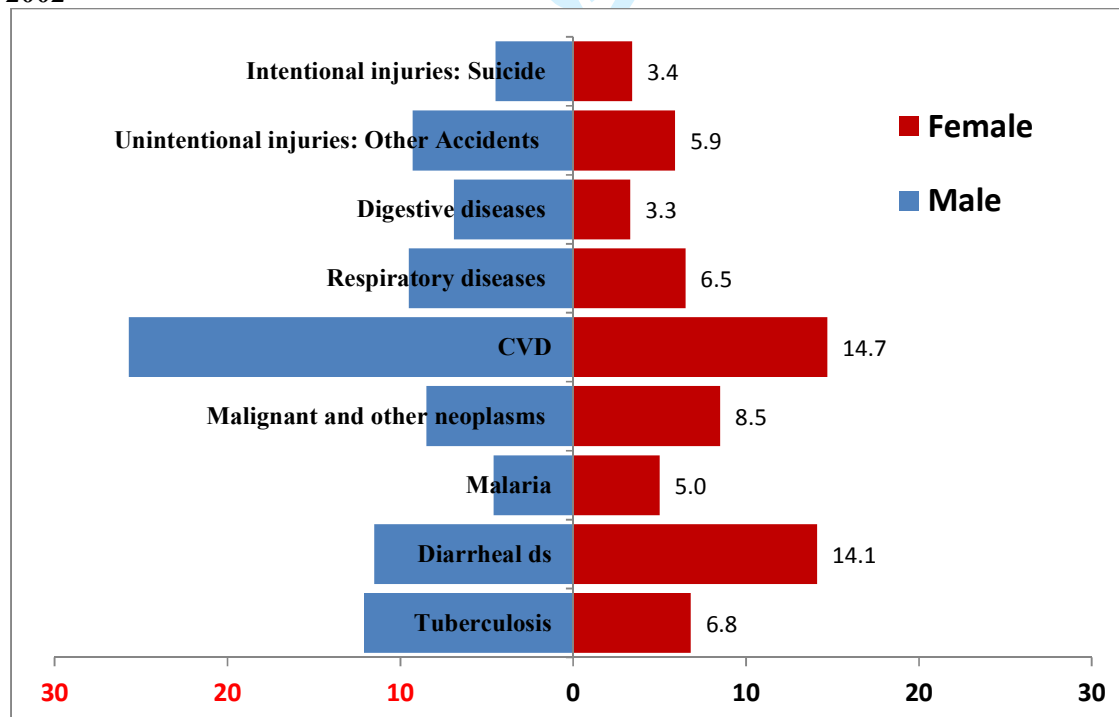

Figure 4: Standardised WYPLL due to top three diseases by age, Male, India, 2002

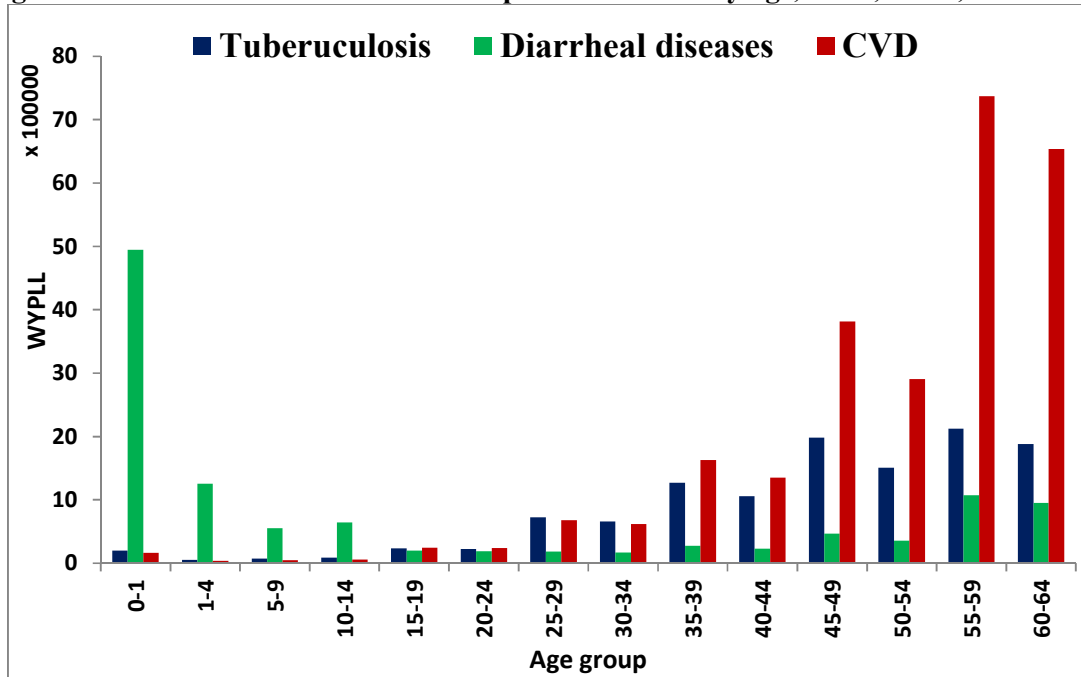

Figure 5: Standardised WYPLL due to top three diseases by age, Female, India, 2002

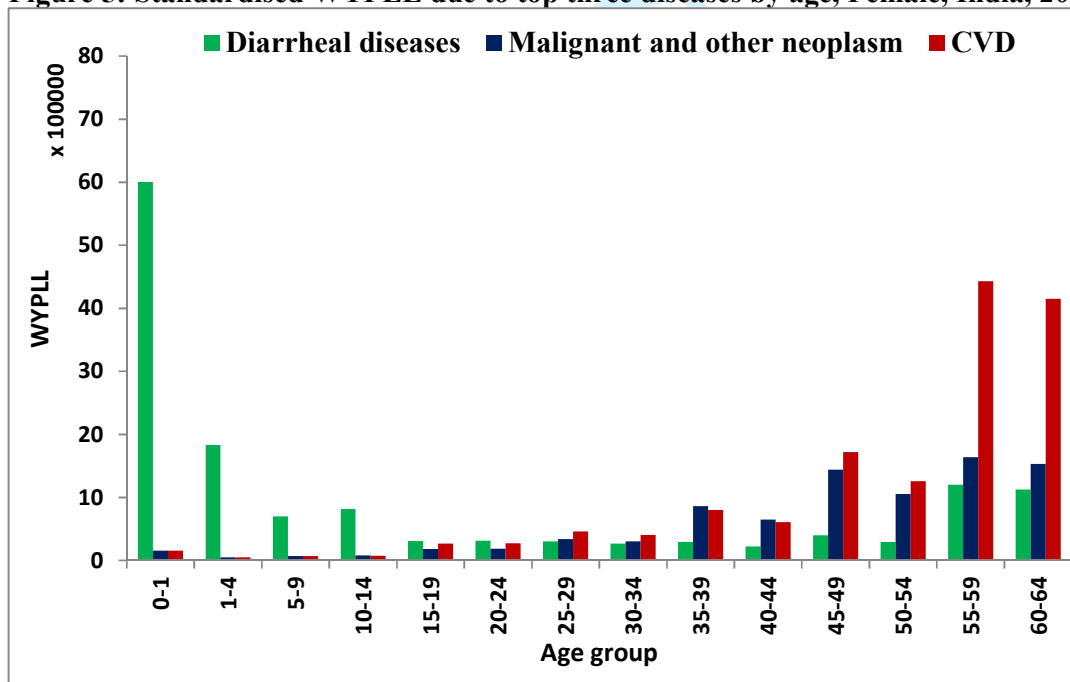

## Research Checklist

1. Title
2. Abstract
  - Background
  - Methods
  - Results
  - Conclusion
3. Strengths and limitation of the studies
4. Introduction
5. Data
  - Ethical issue
  - Census of India
  - Sample Registration System (SRS)
  - Report on Causes of death, 2001-03
6. Methodology
  - Years of potential life lost (PYLL) and its standardization
  - Premature years of potential life lost (PYPLL) and its standardization
  - Working years of potential life lost (WYPLL) and its standardization
7. Results
  - Indices of premature mortality, 1991-2011: YPLL, PYPLL and WYPLL
  - YPLL, PYPLL and WYPLL by causes of death
  - Output in tabular form
8. Conclusion
9. Summary box
  - What is already known on this subject?
  - What does this study add?
10. Author's contribution
11. References
12. Figures

# BMJ Open

## Age and sex pattern of premature mortality in India

|                                 |                                                                                                                                                                     |
|---------------------------------|---------------------------------------------------------------------------------------------------------------------------------------------------------------------|
| Journal:                        | <i>BMJ Open</i>                                                                                                                                                     |
| Manuscript ID:                  | bmjopen-2014-005386.R1                                                                                                                                              |
| Article Type:                   | Research                                                                                                                                                            |
| Date Submitted by the Author:   | 28-Jun-2014                                                                                                                                                         |
| Complete List of Authors:       | Dubey, Manisha; International Institute for Population Sciences , MOHANTY, SANAJY; International Institute for Population Sciences, Department of Fertility Studies |
| <b>Primary Subject Heading</b>: | Public health                                                                                                                                                       |
| Secondary Subject Heading:      | Public health, Research methods, Health policy, Health informatics                                                                                                  |
| Keywords:                       | Public health < INFECTIOUS DISEASES, Coronary heart disease < CARDIOLOGY, PUBLIC HEALTH, Demography < TROPICAL MEDICINE                                             |
|                                 |                                                                                                                                                                     |

SCHOLARONE™  
Manuscripts

Peer Review Only

1  
2  
3 **Title: Age and sex pattern of premature mortality in India**  
4  
5  
6  
7  
8  
9  
10  
11  
12  
13  
14  
15  
16  
17  
18

19 **Author: Manisha Dubey<sup>1</sup> and Sanjay K Mohanty<sup>2</sup>**  
20  
21  
22  
23  
24  
25  
26  
27

28 **Corresponding author:**

29 Manisha Dubey, International Institute for Population Sciences (IIPS), Govandi Station Road,  
30 Deonar, Mumbai-400088, India; Mobil-9757224808, Email: [manikvdlw@gmail.com](mailto:manikvdlw@gmail.com)  
31  
32

33  
34  
35  
36 **Institutional Affiliation:**

37 <sup>1</sup>Research Scholar, International Institute for Population Sciences, Govandi Station Road,  
38 Deonar, Mumbai-400088, India; Mobil-9757224808, Email: [manikvdlw@gmail.com](mailto:manikvdlw@gmail.com),  
39 [manisha.iips@gmail.com](mailto:manisha.iips@gmail.com)  
40

41 <sup>2</sup>Professor, Department of Fertility Studies, International Institute for Population Sciences,  
42 Govandi Station Road, Deonar, Mumbai-400088, India; Mobil-9969687529, Email:  
43 [sanjayiips@yahoo.co.in](mailto:sanjayiips@yahoo.co.in), [sanjay@iips.net](mailto:sanjay@iips.net)  
44  
45  
46  
47  
48

49 **Word count: 4044**  
50  
51  
52  
53  
54  
55  
56  
57  
58  
59  
60

## Abstract

**Objectives:** To estimate the premature mortality by age, sex and cause of death in India.

**Setting:** Studies on premature mortality are limited in India. Though evidences suggest reduction in infant and child mortality little is known on age and sex pattern of premature mortality in India.

**Participants:** Based on secondary data from Sample Registration System and Million Death Study.

**Primary and secondary outcome measures:** : Standardised years of potential life lost (YPLL), premature years of potential life lost (PYPLL) and working years of potential life lost (WYPLL) for broad age groups and by selected causes of death.

**Results:** During 1991-2011, the age-standardized rate of YPLL (per 1000 population) had declined from 310 to 235 for males and from 307 to 206 for females. The estimated YPLL (in million) had declined from 134 to 147 for males and from 123 to 108 for females. The YPLL for adult (aged 15-65) has increased by 32% for males and 28% for females during the same time. The standardized PYPLL (per 1000 population) has declined from 259 to 137 for males and from 258 to 115 for females. The estimated PYPLL for adult males has increased by 13% and by 32% in 30-45 age group. The standardized rate of WYPLL has declined from 274 to 131 for males and from 295 to 901 for females. The age pattern of these indices suggests significant improvement in early childhood mortality and increasing trends for adult males for 30-45 age group. The standardised rate of YPLL and WYPLL for males and females was highest for cardiovascular disease.

**Conclusion:** The increasing share of premature deaths among adults and high level of premature mortality suggest continuation of National Rural Health Mission (NRHM) and increasing programmatic attention on prevention and treatment of non-communicable diseases to save premature deaths in India.

1  
2  
3 **Keywords:** Premature mortality, YPLL, PYPLL, WYPLL, Causes of death  
4  
5  
6

7 **Strengths and limitations of this study:**  
8

9  
10 This is the first ever study that provides the trends in standardised estimates of premature  
11 mortality (YPLL, PYPLL and WYPL) by age and sex in India. It also estimated the  
12 standardised indices by cause of death. However, the study could not analyse the trends and  
13  
14 standardised indices by cause of death. However, the study could not analyse the trends and  
15  
16 pattern in cause specific estimates for the states of India due to unavailability of reliable data  
17  
18 over time.  
19  
20  
21  
22  
23  
24  
25  
26  
27  
28  
29  
30  
31  
32  
33  
34  
35  
36  
37  
38  
39  
40  
41  
42  
43  
44  
45  
46  
47  
48  
49  
50  
51  
52  
53  
54  
55  
56  
57  
58  
59  
60

## Age and sex pattern of premature mortality in India

### Introduction

Premature mortality by age 60 accounts one-third of the total deaths in low and middle income countries in 2008 [1]. While the share of under-five mortality in premature mortality remained high in selected countries, the share of adult mortality is on the rise. The higher level of premature mortality is the mainly due to the demographic and epidemiological transition that has altered the level of mortality and disease pattern across the age groups [2, 3]. The Non-communicable Diseases (NCDs) are the leading cause of death and primarily affecting the working age group [4, 5]. Studies suggest that premature deaths and hospitalisation adversely affect economic growth and development [6-8]. The estimated loss of GDP in 2004 due to Cardiovascular Disease (CVD) alone was about `one trillion in India[8].

The concept of premature mortality was evolved to measure the increasing social and economic cost of mortality at younger age because the conventional measure such as crude death rate and age specific death rate does not quantify the extent of life years lost at early ages[9].The premature mortality is the best single proxy measure for reflecting differences in the health status of the populations [10].A number of measures was developed and used to quantify the extent of premature mortality; potential years of the life lost (PYLL), premature years of potential life lost (PYPLL), the working years of potential life lost (WYPLL) and the valued years of potential life lost (VYPLL). Each of the method is a function of age at death and the number of deaths at that age [11]but vary with respect to weight and upper and lower limit of the age. Though many new indices have been developed to measure the premature mortality like DALY (Disability adjusted life years), HALY (Health adjusted life years), YLL (Years of life lost) etc., these are based on a number of assumptions and data



1  
2  
3 limitations. On the other hand, the YPLL, PYPLL and WYPLL capture the premature  
4 mortality as it is based on fewer assumptions and data input.  
5  
6  
7

8  
9  
10 The potential years of life lost (PYLL) is the most commonly used indicator to quantify  
11 premature mortality. A large number of studies estimated the PYLL to rank the cause of  
12 death and understand level, pattern and differentials in mortality by income, gender, ethnic  
13 groups and regions. Ranking of the major cause of premature mortality using PYLL revealed  
14 that accidents (38.66%) accounts for largest PYLL followed by circulatory system (24.85%)  
15 and Neoplasms (15.67%) in Canada [12]. The PYLL varies largely among OECD countries  
16 and by sex. Among the females, the estimated PYLL (per 1000) was highest in Russian  
17 Federation (7.1) and lowest in Iceland (1.5). Among males, the PYLL was 20.2 in Russia  
18 and 3.0 in Iceland [13]. Using mortality data over four decades, studies found absolute and  
19 relative decline in premature mortality across socio-economic and racial/ethnic group during  
20 the early period (1966-80) and widening relative health inequalities in the subsequent period  
21 (1980-2002) [14]. The large health disparities between African American and other ethnic  
22 groups in San Francisco were estimated using expected years of life lost. With respect to  
23 gender, the estimated years of life lost among males were 73,627 and 51,194 among females.  
24 The leading causes of premature deaths were HIV/AIDS followed by suicide and drug over  
25 dose among males and lung cancer, breast cancer and hypertensive heart diseases among  
26 females [15]. Studies also suggest that the association between income and premature  
27 mortality (deaths before age 75) was stronger among low-income counties compared to high-  
28 income counties. Among various income group, the premature mortality varies by  
29 geographic, socio-demographic, racial/ethnic and behavioural factors [15].  
30  
31  
32  
33  
34  
35  
36  
37  
38  
39  
40  
41  
42  
43  
44  
45  
46  
47  
48  
49  
50  
51  
52  
53

54 Like other developing countries, India is also experiencing rapid demographic and  
55 epidemiological transition. While the total fertility rate is close to replacement level, the life  
56  
57  
58  
59  
60

1  
2  
3 expectancy has reached 64.6years for male and 67.7 years for female by 2008 [16]. There has  
4  
5 been a significant reduction in under-five deaths in last decade from 2.5 million in 2001 to  
6  
7 1.5 million in 2012[17, 18] During 1991 and 2011, the share of under-five deaths to total  
8  
9 deaths has declined from 35% to 17% while that of adult deaths (deaths in 15-59 years) has  
10  
11 increased from 27%to 30%[19].On the other hand, the NCDs are the leading cause of  
12  
13 mortality and morbidity in India. The non-communicable diseases (NCDs) account for 62%  
14  
15 of the total burden of foregone DALYs and 53% of total deaths in India[20].The  
16  
17 cardiovascular deaths (CVDs) was estimated at1.4 million (56.2% in 25-69 age group) in  
18  
19 2004 and projected at 2.1 million (45% in 25-69 age group) by 2021[21].The hospitalisation  
20  
21 rate and outpatient visit due to NCDs rose from 32% to 40% and 22% to 35%, respectively,  
22  
23 during 1995 to 2004[20].The CVDs accounted loss of 9.2 million productive life among 35-  
24  
25 64 years age group in 2000 and projected at 17.9 million by 2030 [22]. Though a large  
26  
27 number studies has been carried out on trends, differentials and determinant of mortality,  
28  
29 there is no study that examined the premature mortality in India [23-26]. In this context it is  
30  
31 necessary to understand the extent of avoidable deaths in India.  
32  
33  
34  
35  
36  
37

38 The aim of this paper is to examine the age and sex pattern of premature mortality in India  
39  
40 over last two decades (1991-2011). It also estimates the extent of premature mortality by  
41  
42 selected causes of death for 2002. The paper has been conceptualised with the following  
43  
44 rationale. First, evidences suggest increase in adult mortality in India, which are premature  
45  
46 and avoidable. The social, psychological and economic costs associated with premature  
47  
48 deaths are devastating. Hence prevention of these deaths must be a public health priority.  
49  
50 Second, the NCDs are the leading cause of death, and the onset of NCDs is 10-15 years  
51  
52 earlier than that of developed countries. These deaths are primarily affecting the working age  
53  
54 group which results into rise in premature mortality. On the other hand, the public health  
55  
56  
57  
58  
59  
60

1  
2  
3 centres are not equipped enough to treat the NCDs. Third, though the premature mortality has  
4  
5 been extensively studied in developed countries, there is no study that has estimated the level  
6  
7 and trend of premature mortality in India. The quantification of premature mortality helps to  
8  
9 identify the social and economic cost associated with mortality, ranks the disease burden and  
10  
11 has greater policy relevance. In this context, this paper provides the numerical estimates on  
12  
13 the premature deaths in India over time and by causes of death for broad age group.  
14  
15  
16  
17  
18

### 19 **Data and methods**

20  
21 This paper uses data from multiple sources; the census of India, 1991, 2001 and 2011, the  
22  
23 sample registration system (SRS), 1991-2011 and report on cause of death, 2001-03 [27-31].  
24  
25 We have used published data and it does not involve any ethical issues. The Indian census is  
26  
27 the largest single source of information on demographic and selected socio-economic  
28  
29 characteristics of the population. We have used the age and sex distribution of the population  
30  
31 for 1991, 2001 and 2011 and the age-sex distribution of intercensal periods (1996 and 2006)  
32  
33 from SRS. Data on causes of death is extremely useful for planning of health programmes  
34  
35 and for intervention strategies. The special survey of deaths (SSD) was jointly undertaken by  
36  
37 the Office of the Registrar General, India (ORGI) and the Centre for Global Health Research  
38  
39 (CGHR) [27] in 2004-05. The SSD was implemented during 2004-05 covering 0.114 million  
40  
41 deaths from 1.1 million households, which have been recorded during 2001-2003 in Sample  
42  
43 Registration System (SRS)[27]. The cause of death was determined using an advanced form  
44  
45 of Verbal Autopsy called the "RHIME" or Representative, Re-sampled, Routine Household  
46  
47 Interview of Mortality with Medical Evaluation method. We have used data on the  
48  
49 distribution of deaths by age, sex and cause from this report to estimate the premature  
50  
51 mortality. We may mention that, besides these sources, the vital registration system and the  
52  
53 Medical Certification of Cause of Deaths (MCCD) provide the deaths by age, sex and  
54  
55  
56  
57  
58  
59  
60

selected characteristics, However, the vital registration system in India is incomplete and have limited used for analyses[32]. The MCCD also have very low coverage and it is not suitable for a representative analysis[33]. .

This paper use three indices, namely, the YPLL, PYPLL and WYPL and .the standardised rates to understand the extent of premature mortality in India. In case of standardised rates, the age distribution of Kerala, 2011 is used as the reference population because the Kerala is demographically advanced state of India. The three year moving average of the ASDR is used. Age group 15-65 years is referred as adult age. The analysis has been carried out for India. The method of computing each of the indices is given below:

#### a. Years of Potential Life Lost (YPLL)

The YPLL is a summary measure of premature mortality that gives higher weight to deaths occurring at younger age and lower weight to the deaths at higher ages. It estimates the average years a person would have lived had he or she not died prematurely[11].The method used in this study is given by:

$$YPLL = \sum_{i=0}^{\infty} d_i * L_i \quad (1)$$

where  $L_i$  is the life expectancy at age  $i$ ,  $d_i$  is the number of deaths at age  $i$ .

The deaths are weighted by life expectancy at each age.

The standardised YPLL and corresponding rates have been calculated as follows[12]:

$$\text{Standardized YPLL} = YPLL * \left(\frac{P_{i,r}}{N_r}\right) * \left(\frac{N}{P_i}\right) \quad (2)$$

Where  $P_{i,r}$  is population in the  $i^{\text{th}}$  age group in the reference population (Kerala);

$N_r$  is the total reference population (Kerala)

$N$  is the total study population;

$P_i$  is the population in the  $i^{\text{th}}$  age group in the study population.

$$\text{Rate of YPLL} = \frac{\sum YPLL}{N} * 1000 \quad (3)$$

#### b. Premature years of potential life lost (PYPLL)

The PYPLL measures the loss of years of productive life due to death before a cut-off age.

The upper age limit on estimating PYLL varies by countries and authors[11]. We have used the upper age limit of 65 years, close to the average longevity in India

$$PYPLL = \sum_{i=0}^U d_i * (U - i) \quad (4)$$

where  $d_i$  is the number of deaths at age  $i$ ,

$U$  is the upper limit of age (65 years).

In each age, the deaths are weighted by difference in upper age limit and age at death.

$$\text{Standardized PYPLL} = PYPLL * \left(\frac{P_{i,r}}{N_r}\right) * \left(\frac{N}{P_i}\right) \quad (5)$$

where  $P_{i,r}$  is the population in the  $i^{\text{th}}$  age group in the reference population (taken as Kerala);

$N_r$  is the total reference population in age group 0 to 65 (taken as Kerala);

$N$  is the total study population in age group 0-65;

$P_i$  is the population in the  $i^{\text{th}}$  age group in the study population.

$$\text{Rate of PYPLL} = \frac{\sum PYPLL}{N} * 1000 \quad (6)$$

where  $N$  is the total population in age group 0 to 65.

#### c. Working years of potential life lost (WYPLL)

The WYPLL measures the working life years lost during “the working age period” in a population.

$$WYPLL = \sum_{i=0}^{W-1} d_i * (U - W) + \sum_{i=W}^N d_i * (U - i) \quad (7)$$

where  $d_i$  is the number of deaths at age  $i$ ,

$U$  is the upper cut off age (65 years);

$W$  is the lower cut-off age (14 years).

Here a constant weight is assigned to the deaths before age 14 years; difference in upper and lower age cut-off and deaths at age 14 and above are weighted by difference between upper age limit and age at death.

$$\text{Standardized WYPLL} = \text{WYPLL} * \left(\frac{P_{i,r}}{N_r}\right) * \left(\frac{N}{P_i}\right) \quad (8)$$

where  $P_{i,r}$  is population in the  $i^{\text{th}}$  age group in the reference population (taken as Kerala);

$N_r$  is the total reference population in age group 0 to 65 (taken as Kerala);

$N$  is the total study population in the age group 0 to 65;

$P_i$  is the population in the  $i^{\text{th}}$  age group in the study population.

$$\text{Rate of WYPLL} = \frac{\sum \text{WYPLL}}{N} * 1000 \quad (9)$$

where  $N$  is the total study population in the age group 0 to 65 years.

The estimated population and deaths by age and sex over 1991-2011 is shown in Appendix 1 and 2.

### Cause specific indices of premature mortality

We have also computed the YPLL, PYPLL and WYPLL for selected causes of death using the similar methods and weighting procedure for 2002. The distribution of deaths by cause, age and sex and taken from Report on Causes of Death, RGI, 2001-03. The weight assigned for each age group is inbuilt in the each of the indices. In general, in each of the method, the younger age groups get a higher weight age and the older age group gets a lower weight.

### Results

Results are presented in two sections. Section 1 describes the trend of premature mortality by age and sex and section 2 describe the estimated years of premature deaths by causes of death.

## Section 1: Trends in premature mortality by age and sex, 1991-2011

Table 1 presents the standardized YPLL in millions for a period of two decades (1991-2011) by broad age group and sex. During 1991-2011, the YPLL has increased from 134million to 147 million among males while it has declined from 123 million to 108 million among female. The rate of YPLL has declined from 310 to 235 per 1000 population for males and from 307 to 206 for females in the same period. Though the overall decline in YPLL reflects the marked improvement in mortality in the population, it conceals large discrepancies in broad age group. The decline in YPLL was significant among younger age group, particularly among children while it has increased among adults (15-64 years). Among children under five years of age, the YPLL has declined by 38% for male and 32% for females in the same period. Among adults (in 15-64 age groups), the YPLL has increased for males in most of the age group. For example during 1991-2011, the YPLL for males in 30-45 age group has increased by 48% and for 45-59 it has increased by 25%. Among adult females, the largest decline in YPLL was in the age group 5-14 and increased in the age group 60-70. Though the absolute value of YPLL has increased during 1991-2011, the rate of YPLL has declined. Though the YPLL has declined largely for 0-4 year, it remains highest in this age group. The YPLL has not shown secular decline; had initially increased during 1991-2001 and declined thereafter.

**Table 1: Trends in years of potential life lost (YPLL) in million (standardised) by age and sex and rate of YPLL (per 1000 population) in India, 1991-2011**

| Age group        | 1991            |              | 1996         |              | 2001       |              | 2006         |              | 2011         |              | Percentage reduction (1991-2011) |             |
|------------------|-----------------|--------------|--------------|--------------|------------|--------------|--------------|--------------|--------------|--------------|----------------------------------|-------------|
|                  | YPLL in million | Male         | Female       | Male         | Female     | Male         | Female       | Male         | Female       | Male         | Female                           | Male        |
| <b>0-4</b>       | 56.3            | 53.1         | 50.2         | 48.0         | 62.3       | 60.4         | 45.0         | 41.5         | 35.0         | 36.3         | 37.8                             | 31.6        |
| <b>5-14</b>      | 7.8             | 7.9          | 7.9          | 8.3          | 7.3        | 7.0          | 7.2          | 6.8          | 5.6          | 5.0          | 28.2                             | 36.7        |
| <b>15-29</b>     | 10.9            | 13.2         | 11.3         | 13.0         | 13.1       | 14.7         | 13.1         | 12.9         | 12.2         | 11.2         | -11.9                            | 15.2        |
| <b>30-45</b>     | 12.6            | 11.9         | 14.4         | 12.5         | 17.4       | 13.6         | 18.2         | 12.5         | 18.7         | 10.6         | -48.4                            | 10.9        |
| <b>45-59</b>     | 22.5            | 14.9         | 24.6         | 17.2         | 28.1       | 18.7         | 26.5         | 16.7         | 28.2         | 16.9         | -25.3                            | -13.4       |
| <b>60-70</b>     | 13.4            | 10.8         | 17.1         | 13.5         | 18.4       | 14.6         | 18.6         | 15.0         | 20.0         | 15.1         | -49.3                            | -39.8       |
| <b>70+</b>       | 10.5            | 11.5         | 20.2         | 23.0         | 18.4       | 12.4         | 23.8         | 50.5         | 26.8         | 30.7         | -155.2                           | -167.0      |
| <b>0-14</b>      | 64.1            | 60.9         | 58.1         | 56.2         | 69.5       | 67.4         | 52.2         | 48.3         | 40.7         | 15.1         | 36.5                             | 75.2        |
| <b>15-65</b>     | 52.7            | 45.1         | 59.9         | 49.8         | 67.7       | 53.8         | 68.1         | 49.9         | 69.6         | 57.8         | -32.1                            | -28.2       |
| <b>Total</b>     | <b>134.1</b>    | <b>123.2</b> | <b>145.7</b> | <b>135.3</b> | <b>165</b> | <b>141.3</b> | <b>152.5</b> | <b>155.8</b> | <b>146.6</b> | <b>107.9</b> | <b>-9.3</b>                      | <b>12.4</b> |
| <b>YPLL Rate</b> | 310.0           | 306.9        | 302.8        | 302.4        | 311.0      | 285.4        | 264.6        | 288.8        | 235.2        | 206.0        | 24.1                             | 32.9        |

Table 2 provides the premature years of potential life lost (PYPLL) by age and sex in last two decades. The PYP LL fixes an upper limit to which individual are expected to survive and measures the loss of years of productive life due to death before a selected cut-off age. During 1991-2011, the estimated PYPLL for male has declined from 108 to 81 million while that of females has declined from 99 to 64 million. The rate of PYPLL among males has declined from 259 in 1991 to 224 in 2001 and further to 137 by 2011. Among females, the rate of PYPLL has declined from 258 in 1991 to 213 in 2001 and 115 in 2011. The decline in PYPLL is faster among females compared to males. During 1991-2011, the YPLL among children under five years of age has declined from 64 million years to 35 million years for male and from 60 million to 34 million years for females. The decline was secular for both male and females. On the other hand, in age group (15-65), the PYPLL has declined for females but not for males. The PYPLL for males in the age group 30-45 has increased from 11 million years to 14 million years. In all the years studied, the PYPLL among males was highest in 0-4 age group followed by age group 45-59 years. Similarly for females the PYPLL was highest in 0-4 age group followed by 15-29 age group. The PYPLL was



increased by 13% among adult males and declined by 20% among adult females. The increase in PYPLL among males was highest in the age group 30-45 (32%) followed by 60-65. While declining in PYPLL among children is a good sign, the increase in these indices among adult in the prime working age group is a concern. This is possibly due to increase in non-communicable diseases that are largely affecting the prime working age groups.

**Table 2: Trends in premature years of potential life lost (PYPLL) in million (standardised) by age and sex and rate of PYPLL (per 1000 population) in India, 1991-2011**

| Age group               | 1991         |              | 1996         |              | 2001         |              | 2006         |              | 2011         |              | Percentage reduction (1991-2011) |             |
|-------------------------|--------------|--------------|--------------|--------------|--------------|--------------|--------------|--------------|--------------|--------------|----------------------------------|-------------|
|                         | Male         | Female       | Male                             | Female      |
| <b>PYPLL in million</b> |              |              |              |              |              |              |              |              |              |              |                                  |             |
| <b>0-4</b>              | 63.8         | 60.1         | 54.0         | 51.2         | 65.5         | 61.9         | 46.1         | 41.1         | 34.9         | 34.5         | 45.3                             | 42.6        |
| <b>5-14</b>             | 7.8          | 7.7          | 7.5          | 7.7          | 6.7          | 6.4          | 6.7          | 6.0          | 5.1          | 4.3          | 34.6                             | 44.2        |
| <b>15-29</b>            | 10.4         | 12.2         | 10.2         | 11.3         | 11.7         | 12.3         | 11.5         | 10.7         | 10.5         | 9.0          | -1.0                             | 26.2        |
| <b>30-45</b>            | 10.8         | 9.6          | 11.6         | 9.4          | 13.6         | 9.9          | 14.0         | 8.9          | 14.2         | 7.3          | -31.5                            | 24.0        |
| <b>45-59</b>            | 13.6         | 8.5          | 13.4         | 8.7          | 14.5         | 8.8          | 13.7         | 7.8          | 14.4         | 7.6          | -5.9                             | 10.6        |
| <b>60-65</b>            | 1.3          | 0.9          | 1.6          | 1.1          | 1.4          | 1.0          | 1.6          | 1.1          | 1.6          | 1.0          | -23.1                            | -11.1       |
| <b>0-14</b>             | 71.6         | 67.8         | 61.5         | 58.9         | 72.2         | 68.3         | 52.8         | 47.1         | 40.0         | 38.8         | 44.1                             | 42.8        |
| <b>15-65</b>            | 36.1         | 31.2         | 36.8         | 30.5         | 41.2         | 32.0         | 40.8         | 28.5         | 40.7         | 24.9         | -12.7                            | 20.2        |
| <b>Total</b>            | <b>107.7</b> | <b>99.1</b>  | <b>98.3</b>  | <b>89.4</b>  | <b>113.6</b> | <b>100.1</b> | <b>93.6</b>  | <b>75.5</b>  | <b>80.9</b>  | <b>63.8</b>  | <b>24.9</b>                      | <b>35.6</b> |
| <b>WYPLL Rate</b>       | <b>259.4</b> | <b>257.6</b> | <b>212.6</b> | <b>208.8</b> | <b>224.2</b> | <b>212.9</b> | <b>170.0</b> | <b>147.0</b> | <b>136.9</b> | <b>115.2</b> | 47.2                             | 55.3        |

Table 3 presents the working years of potential life lost (WYPLL) by age and sex for last two decades. The WYPLL gives a higher weightage to working age population. During 1991-2011, the WYPLL has declined from 114 million to 77 million among males and from 113 million to 45 million among females. The rate of WYPLL has declined from 274 in 1991 to 131 per 100 for males. Among females, the rate of WYPLL has declined from 295 in 1991 to 91 in 2011. The estimate of WYPLL by age over time shows a similar pattern as that of YPLL. Among females, the WYPLL has declined over all age group while for males it has declined only for younger age group. Among males aged 30-45 years, the WYPLL has increased from 9 million years in 1991 to 13 million years by 2011. The WYPLL was higher among females compared to males at all age group. The standardisation of WYPLL does not change the gradient across age and sex over a period of time but level has changed.

**Table 3: Trends in working years of potential life lost (WYPLL) in million (standardised) by age and sex and rate of WYPLL (per 1000 population) in India, 1991-2011**

| Age group               | 1991         |              | 1996         |              | 2001         |              | 2006         |              | 2011         |             | Percentage reduction (1991-2011) |             |
|-------------------------|--------------|--------------|--------------|--------------|--------------|--------------|--------------|--------------|--------------|-------------|----------------------------------|-------------|
|                         | Male         | Female       | Male         | Female       | Male         | Female       | Male         | Female       | Male         | Female      | Male                             | Female      |
| <b>WYPLL in million</b> |              |              |              |              |              |              |              |              |              |             |                                  |             |
| <b>0-4</b>              | 73.4         | 76.9         | 61.3         | 63.0         | 72.3         | 74.8         | 47.9         | 46.0         | 34.0         | 36.4        | 53.7                             | 52.7        |
| <b>5-14</b>             | 10.3         | 11.4         | 9.8          | 10.9         | 8.7          | 8.9          | 8.0          | 7.8          | 5.7          | 5.3         | 44.7                             | 53.5        |
| <b>15-29</b>            | 8.7          | 10.0         | 8.5          | 9.3          | 10.0         | 10.2         | 10.2         | 9.3          | 9.7          | 8.1         | -11.5                            | 19.0        |
| <b>30-45</b>            | 9.0          | 7.7          | 9.7          | 7.8          | 11.6         | 8.3          | 12.4         | 7.7          | 13.1         | 6.5         | -45.6                            | 15.6        |
| <b>45-59</b>            | 11.4         | 6.8          | 11.3         | 7.1          | 12.4         | 7.2          | 12.2         | 6.8          | 13.2         | 6.8         | -15.8                            | 0.0         |
| <b>60-65</b>            | 1.1          | 0.8          | 1.4          | 0.9          | 1.2          | 0.8          | 1.4          | 1.0          | 1.5          | 0.9         | -36.4                            | -12.5       |
| <b>0-14</b>             | 83.7         | 88.3         | 71.1         | 73.9         | 81.0         | 83.7         | 55.9         | 53.8         | 39.7         | 41.7        | 52.6                             | 52.8        |
| <b>15-65</b>            | 30.2         | 25.3         | 30.9         | 25.1         | 35.2         | 26.5         | 36.2         | 24.8         | 37.5         | 22.3        | -24.2                            | 11.9        |
| <b>Total</b>            | <b>113.8</b> | <b>113.0</b> | <b>102.2</b> | <b>99.0</b>  | <b>116.3</b> | <b>110.0</b> | <b>92.1</b>  | <b>78.0</b>  | <b>77.2</b>  | <b>45.0</b> | <b>32.2</b>                      | <b>60.2</b> |
| <b>WYPLL Rate</b>       | <b>274.2</b> | <b>294.8</b> | <b>220.9</b> | <b>231.5</b> | <b>229.6</b> | <b>234.3</b> | <b>167.3</b> | <b>152.8</b> | <b>130.7</b> | <b>90.6</b> | 52.3                             | 69.3        |

## Section 2: Premature mortality by causes of death

Table 4 and figure 1, 2 and 3 presents the indices of premature mortality by causes of death for male and female. We have taken top nine causes of death among adults and computed YPLL, PYPLL and WYPLL. These indices were estimated for the year 2002 because the causes of death data were available only for this period. Among the nine leading causes of death, the CVD account for maximum loss in YPLL and WYPLL. The WYPLL among males was 26 million due to CVDs, 12 million due to Tuberculosis and 11 million due to Diarrheal diseases. The rate of WYPLL among males was also maximum for CVDs (50) followed by Tuberculosis (23) and diarrheal diseases (22). Similarly, for females, the WYPLL was highest for CVDs (15 million) followed by Diarrheal diseases (14) and malignant and other neoplasms (8). Among males, the YPLL was highest for CVDs (21) followed by diarrheal diseases (12) and Tuberculosis (9). For females, the YPLL was highest for CVDs (17) followed by diarrheal diseases (9) and Respiratory diseases (8). In terms of PYPLL, among males, the PYPLL rate was highest for diarrheal diseases (9) followed by CVDs (8) and accidents (7). In the case of females also, the rate of PYPLL was highest due to diarrheal diseases (11) followed by CVD (4) and accidents (4). The corresponding rate of the YPLL, PYPLL and WYPLL shows the same trend for the given causes of deaths.

**Table 4: Estimates of YPLL, PYPLL and WYPLL and the corresponding rates by cause in India,2002**

| Causes of death               | Rate (per 1000 population) |        |       |        |       |        | Absolute number (million) |        |       |        |       |        |
|-------------------------------|----------------------------|--------|-------|--------|-------|--------|---------------------------|--------|-------|--------|-------|--------|
|                               | YPLL                       |        | PYPLL |        | WYPLL |        | YPLL                      |        | PYPLL |        | WYPLL |        |
|                               | Male                       | Female | Male  | Female | Male  | Female | Male                      | Female | Male  | Female | Male  | Female |
| Tuberculosis                  | 16.7                       | 13.0   | 9.7   | 7.7    | 23.3  | 14.2   | 9.0                       | 6.6    | 5.0   | 3.7    | 12.1  | 6.8    |
| Diarrheal diseases            | 21.4                       | 17.6   | 17.6  | 23.0   | 22.2  | 29.4   | 11.6                      | 8.9    | 9.1   | 11.0   | 11.5  | 14.1   |
| Malaria                       | 7.9                        | 7.8    | 5.9   | 7.2    | 8.8   | 10.4   | 4.3                       | 4.0    | 3.1   | 3.5    | 4.6   | 5.0    |
| Malignant and other neoplasms | 11.9                       | 14.6   | 6.2   | 7.1    | 16.4  | 17.8   | 6.4                       | 7.3    | 3.2   | 3.4    | 8.5   | 8.5    |
| CVD                           | 38.2                       | 33.3   | 14.6  | 9.5    | 49.6  | 30.7   | 20.7                      | 16.8   | 7.6   | 4.5    | 25.7  | 14.7   |
| Respiratory diseases          | 15.5                       | 16.0   | 4.0   | 3.3    | 18.3  | 13.5   | 8.4                       | 8.1    | 2.1   | 1.6    | 9.5   | 6.5    |
| Digestive diseases            | 9.7                        | 5.9    | 5.9   | 3.8    | 13.2  | 6.9    | 5.2                       | 3.0    | 3.1   | 1.8    | 6.9   | 3.3    |
| Unintentional injuries: Other | 16.1                       | 10.4   | 12.7  | 8.8    | 17.9  | 12.3   | 8.7                       | 5.2    | 6.6   | 4.2    | 9.3   | 5.9    |
| Accidents                     | 16.1                       | 10.4   | 12.7  | 8.8    | 17.9  | 12.3   | 8.7                       | 5.2    | 6.6   | 4.2    | 9.3   | 5.9    |
| Intentional injuries: Suicide | 7.3                        | 7.3    | 5.8   | 5.8    | 8.6   | 7.1    | 3.9                       | 3.7    | 3.0   | 2.8    | 4.5   | 3.4    |

Figure 4 and 5 depicts the age pattern of WYPLL for top three causes of death among male and female respectively. The Diarrheal diseases accounts for the majority of the years lost among children (0-14 years) whereas CVD accounts for the highest life years lost among adults and old population. The adult population is affected by both communicable and non-communicable diseases. For example, among males, CVD and Tuberculosis are high in adult ages. Similarly, among adult females, CVD and Malignant and other neoplasms are leading causes of premature mortality.

### Discussion and Conclusion

The concept of premature mortality has been used as an important measure of health status and a guide for health policies of many developed countries. Estimates of premature mortality and understanding the factors affecting premature mortality are prerequisite in reducing avoidable mortality and improving the health of the population and. In last two decade, India has made significant progression in reduction of infant and child mortality and improvement in longevity. The increase in this health outcome is evident across socio-economic groups and space. A number of studies have helped in understanding the differentials, determinants and

1  
2  
3 inequality in infant and child mortality in India [17, 34-36]. However, evidences suggest  
4  
5 increasing adult mortality and there are limited studies that covered the premature mortality  
6  
7 in India. In this context, we have attempted to provide the numerical estimates on premature  
8  
9 mortality using a set of indices by age and sex over two decades. We have used the published  
10  
11 data from SRS, special survey on cause of death and estimated the YPLL, PYPLL and  
12  
13 WYPLL for broad age groups. Though the estimates on premature mortality by cause of  
14  
15 death are 13 years old, the inferences will not change because of increasing NCDs. The  
16  
17 following are the salient findings.  
18  
19

20  
21  
22 First, we found a decline in premature mortality indices (YPLL, PYPLL and WYPLL) and  
23  
24 their rates for both male and female except YPLL for males. This is consistent with the  
25  
26 overall improvement in health situation of the population. Second, the decline in premature  
27  
28 mortality indices conceals large differential across the age group and sex. While the decline  
29  
30 in premature mortality indices is largely due to improvement in mortality in the younger age  
31  
32 group e.g. 0-14 years, it has indeed increased among male adults. Third, the age pattern of the  
33  
34 indices reveals that the premature mortality continued to be highest in 0-4 age group though  
35  
36 the decline was highest in the same age group; declined by more than one-third in last two  
37  
38 decades. However, all these indices have increased in 35-49 age group suggesting increasing  
39  
40 in adult male mortality. Fourth, the YPLL and WYPLL were highest due to CVDs for both  
41  
42 male and female. Most of the CVD deaths are premature and affecting the prime working age  
43  
44 groups. Fifth the estimate of PYPLL was highest for Diarrheal diseases followed by CVDs.  
45  
46 This is because the PYPLL gives a higher weightage to children and the Diarrheal diseases  
47  
48 are higher among children.  
49  
50  
51  
52  
53  
54  
55  
56  
57  
58  
59  
60

1  
2  
3 From the above findings, it is clear that the level of premature mortality in India is higher  
4 than many developing and developed countries. The level of premature mortality is high not  
5 only because of higher under-five mortality but also due to higher adult mortality. While the  
6 existing programme in reduction of under-five mortality should continue, the programme  
7 needs to be intensified for reduction of adult mortality. Reduction in adult mortality can be  
8 achieved by increasing budgetary spending for NCDs of central and state government that  
9 would help to intensify efforts on prevention and management of NCDs. Large scale  
10 investment on medical infrastructure for NCDs and increase coverage of health insurance will  
11 be helpful in this direction. The policies to reduce production and consumption of alcohol and  
12 tobacco and creating awareness on healthy life style can reduce the risk factors of NCDs and  
13 avoidable mortality. The programme on NCDs by central government are in place and the  
14 twelfth five year plan made specific provision for management and control of NCDs under  
15 three categories; programmes for life style chronic diseases and risk factor, programmes for  
16 disability prevention and rehabilitation and health promotion and prevention of NCDs[37].  
17  
18 The continuation of maternal and child health programme and effective implementation of  
19 non-communicable diseases can reduce avoidable mortality in India.  
20  
21  
22  
23  
24  
25  
26  
27  
28  
29  
30  
31  
32  
33  
34  
35  
36  
37  
38  
39  
40  
41  
42  
43  
44  
45  
46  
47  
48  
49  
50  
51  
52  
53  
54  
55  
56  
57  
58  
59  
60

## Summary box

### **What is already known on this Subject?**

In last two decades, along with socio-economic development, India has made significant improvement in health outcome. While the life expectancy at birth has increased, the infant mortality rate and child mortality rate has declined across socio-economic groups. The diseases pattern is changing fast and the non-communicable diseases are the leading cause of death in India. The premature mortality is resultant of low child survival and increasing NCDs in India.

### **What does this study add?**

This study adds to the available literature on premature mortality by providing the standardised estimates of premature mortality by age and sex in India over two decades. It also suggests that the premature mortality is on rise among men in prime working age group. The cardiovascular disease is the leading cause of premature mortality followed by diarrheal diseases.

**Author's Contribution:** MD and SKM conceptualised the paper, prepared analytical plan and drafted the paper.

**Conflict of Interest:** None

**Funding and Ethical Issues:** It is an independent research and did not receive any funding.

**Data Sharing:** No additional data available

## References

- 1 WHO. Premature NCD deaths: Situation and trends. Geneva: World Health Organisation 2014.
- 2 Joshi R, Cardona M, Iyengar S, *et al*. Chronic diseases now a leading cause of death in rural India--mortality data from the Andhra Pradesh Rural Health Initiative. *International journal of epidemiology* 2006;**35**:1522-9.
- 3 Quigley MA. Commentary: shifting burden of disease--epidemiological transition in India. *International journal of epidemiology* 2006;**35**:1530-1.
- 4 Upadhyay RP. An overview of the burden of non-communicable diseases in India. *Iranian journal of public health* 2012;**41**:1-8.
- 5 Goyal A, Yusuf S. The burden of cardiovascular disease in the Indian subcontinent. *The Indian journal of medical research* 2006;**124**:235-44.
- 6 Bloom DE, Canning D. Health and Economic Growth: Reconciling the Micro and Macro Evidence. *CDDRL WORKING PAPERS*. Stanford: Stanford University 2005.
- 7 Bloom DE, Canning D, Sevilla J. The Effect of Health on Economic Growth: A Production Function Approach. *World Development* 2004;**32**:1-13.
- 8 Mahal A. The poor and health service use in India. *Health, Nutrition and Population (HNP) Discussion Paper*. The World Bank: Washington, DC 2001.
- 9 Dempsey M. Decline in tuberculosis: the death rate fails to tell the entire story. *Am Rev Tuberculosis* 1947;**56**:157-64.
- 10 Scanlon WJ. A Health Status Indicator for Targeting Federal Aid to States. In: Fastrup J, ed. *Report to the Chairman, Committee on Labor and Human Resources, US Senate*. USA: United States General Accounting Office 1996.
- 11 Gardner JW, Sanborn JS. Years of potential life lost (YPLL)--what does it measure? *Epidemiology (Cambridge, Mass)* 1990;**1**:322-9.
- 12 Romeder JM, McWhinnie JR. Potential years of life lost between ages 1 and 70: an indicator of premature mortality for health planning. *International journal of epidemiology* 1977;**6**:143-51.
- 13 OECD. Premature mortality. *Health at a Glance 2011: OECD Indicators*. OECD Publishing: Organisation of Economic Cooperation and Development 2011.
- 14 Krieger N, Rehkopf DH, Chen JT, *et al*. The Fall and Rise of US Inequities in Premature Mortality: 1960--2002. *PLoS Med* 2008;**5**:e46.
- 15 Cheng ER, Kindig DA. Disparities in Premature Mortality Between High- and Low-Income US Counties. *Prev Chronic Dis* 2012;**9**.
- 16 RGI. SRS Based Abridged Life Tables 2003-07 to 2006-10 In: General R, ed. *SRS Analytical Studies*. New Delhi: Registrar General & Census Commissioner 2012.
- 17 Ram U, Jha P, Ram F, *et al*. Neonatal, 1-59 month, and under-5 mortality in 597 Indian districts, 2001 to 2012: estimates from national demographic and mortality surveys. *The Lancet Global Health* 2013;**1**:e219-e26.
- 18 UN. World Population Prospects: The 2012 Revision. In: Population Division DoEaSA, ed. New York: United Nations 2014.
- 19 Dubey M. Trends and prospects of adult mortality by cause of death in India. Mumbai: International Institute for Population Sciences 2013:117.
- 20 JS Thakur SP, Charu C. Garg, Shanthi Mendis *et al*. Social and Economic Implications of Noncommunicable diseases in India. *Indian Journal of Community Medicine* 2011;**36(Suppl1)**:13-22.

- 1  
2  
3 21 Srivastava A, Mohanty SK. Age and sex pattern of cardiovascular mortality,  
4 hospitalisation and associated cost in India. *PloS one* 2013;**8**:e62134.  
5 22 K Srinath Reddy BS, Cherian Varghese, et al. Responding to the threat of chronic  
6 diseases in India. *Lancet* 2005;**366**:1744-9.  
7 23 Saikia N, Jasilionis D, Ram F, *et al.* Trends and geographic differentials in mortality  
8 under age 60 in India. *Population studies* 2011;**65**:73-89.  
9 24 Dubey M. Trends and prospects of adult mortality in India. Mumbai: International  
10 Institute for Population Sciences 2013:117.  
11 25 Singh A, Ladusingh L. Increasing life expectancy and convergence of age at death in  
12 India. *GENUS* 2013;**69**:83-9.  
13 26 Yadav A, Yadav S, Kesarwani R. Decelerating Mortality Rates in Older Ages and its  
14 Prospects through Lee-Carter Approach. *PloS one* 2012;**7**:e50941.  
15 27 RGI. Report on Cause of Death in India 2001-2003. Office of the Registrar General of  
16 India 2009.  
17 28 Census. Census of India 2011. New Delhi: Registrar General & Census  
18 Commissioner. 2011.  
19 29 Census. Census of India 2001. New Delhi: Registrar General & Census  
20 Commissioner. 2001.  
21 30 Census. Census of India 1991. New Delhi: Registrar General & Census  
22 Commissioner. 1991.  
23 31 RGI. Sample Registration System Statistical Report (for the year 1991-2011). New  
24 Delhi: Office of The Registrar General, Ministry of Home Affairs, Government of India  
25 32 India RGo. Vital Statistics of India Based on the Civil Registration System 2010. New  
26 Delhi: Office of the Registrar General of India, Ministry of Home Affairs, Government of  
27 India 2013.  
28 33 RGI. Report on Medical Certification of Cause of Death, 2010. New Delhi 2014.  
29 34 Mohanty SK. Multidimensional Poverty and Child Survival in India. *PloS one*  
30 2011;**6**:e26857.  
31 35 Saikia N, Singh A, Jasilionis D, *et al.* Explaining the rural-urban gap in infant  
32 mortality in India. *Demographic Research* 2013;**29**:473-506.  
33 36 Singh A, Pathak PK, Chauhan RK, *et al.* Infant and Child Mortality in India in the  
34 Last Two Decades: A Geospatial Analysis. *PloS one* 2011;**6**:e26856.  
35 37 Planning Commission. Report of the Working Group on Disease Burden for 12th Five  
36 Year Plan. New Delhi: Planning Commission of India, Government of India 2011.  
37  
38  
39  
40  
41  
42  
43  
44  
45  
46  
47  
48  
49  
50  
51  
52  
53  
54  
55  
56  
57  
58  
59  
60



**FIGURE LEGENDS**

Figure 1: YPLL (in million) for top nine causes of death among adults by sex in India, 2002

Figure 2: PYPLL (in million) for top nine causes of death among adults by sex in India, 2002

Figure 3: WYPLL (in million) for top nine causes of death among adults by sex in India, 2002

Figure 4: Standardised WYPLL by top three diseases and age among males in India, 2002

Figure 5: Standardised WYPLL by top three diseases and age among females in India, 2002

1  
2  
3  
4  
5  
6  
7  
8  
9  
10  
11  
12  
13  
14  
15  
16  
17  
18  
19  
20  
21  
22  
23  
24  
25  
26  
27  
28  
29  
30  
31  
32  
33  
34  
35  
36  
37  
38  
39  
40  
41  
42  
43  
44  
45  
46  
47  
48  
49  
50  
51  
52  
53  
54  
55  
56  
57  
58  
59  
60

**Title: Age and sex pattern of premature mortality in India**

**Author: Manisha Dubey<sup>1</sup> and Sanjay K Mohanty<sup>2</sup>**

**Corresponding author:**

Manisha Dubey, International Institute for Population Sciences (IIPS), Govandi Station Road, Deonar, Mumbai-400088, India; Mobil-9757224808, Email: [manikvdlw@gmail.com](mailto:manikvdlw@gmail.com)

**Institutional Affiliation:**

<sup>1</sup>-Research Scholar, International Institute for Population Sciences, Govandi Station Road, Deonar, Mumbai-400088, India; Mobil-9757224808, Email: [manikvdlw@gmail.com](mailto:manikvdlw@gmail.com), [manisha.iips@gmail.com](mailto:manisha.iips@gmail.com)

<sup>2</sup>Professor, Department of Fertility Studies, International Institute for Population Sciences, Govandi Station Road, Deonar, Mumbai-400088, India; Mobil-9969687529, Email: [sanjayiips@yahoo.co.in](mailto:sanjayiips@yahoo.co.in), [sanjay@iips.net](mailto:sanjay@iips.net)

**Keywords:** ~~Premature mortality, YPLL, PYPLL, WYPLL, Causes of death~~

**Word count:** ~~33154044~~

Formatted: Font: Times New Roman

1

## Abstract

**Objectives:** To estimate the premature mortality by age, sex and cause of death in India.

**Setting:** Studies on premature mortality are limited in India. Though evidences suggest reduction in infant and child mortality little is known on age and sex pattern of premature mortality in India.

**Participants:** Based on secondary data from Sample Registration System and Million Death Study.

**Primary and secondary outcome measures:** : Standardised years of potential life lost (YPLL), premature years of potential life lost (PYPLL) and working years of potential life lost (WYPLL) for broad age groups and by selected causes of death.

**Results:** During 1991-2011, the age-standardized rate of YPLL (per 1000 population) had declined from 310 to 235 for males and from 307 to 206 for females. The estimated YPLL (in million) had declined from 134 to 147 for males and from 123 to 108 for females. The YPLL for adult (aged 15-65) has increased by 32% for males and 28% for females during the same time. The standardized PYPLL (per 1000 population) has declined from 259 to 137 for males and from 258 to 115 for females. The estimated PYPLL for adult males has increased by 13% and by 32% in 30-45 age group. The standardized rate of WYPLL has declined from 274 to 131 for males and from 295 to 901 for females. The age pattern of these indices suggests significant improvement in early childhood mortality and increasing trends for adult males for 30-45 age group. The standardised rate of YPLL and WYPLL for males and females was highest for cardiovascular disease.

**Conclusion:** The increasing share of premature deaths among adults and high level of premature mortality suggest continuation of National Rural Health Mission (NRHM) and increasing programmatic attention on prevention and treatment of non-communicable diseases to save premature deaths in India.

1  
2  
3  
4  
5  
6  
7 Background: Though evidences suggest reduction in infant and child mortality little is known  
8 on age and sex pattern of premature mortality in India. Using data from multiple sources, this  
9 paper estimates the age and sex pattern of premature mortality in India.

10  
11  
12  
13  
14 Methods: The standardised years of potential life lost (YPLL), premature years of potential  
15 life lost (PYPLL) and working years of potential life lost (WYPLL) are computed for broad  
16 age groups over two decades (1991-2011) and by selected causes of death for 2002.

17  
18  
19  
20  
21  
22 Results: During 1991-2011, the age standardized rate of YPLL (per 1000 population) had  
23 declined from 310 to 235 for male and from 307 to 206 for females. The estimated YPLL (in  
24 million) had declined from 134 to 147 for male and from 123 to 108 for females. The YPLL  
25 for adult (aged 15-65) has increased by 32% for males and 28% for females during the same  
26 time. The standardized PYPLL (per 1000 population) has declined from 259 to 137 for males  
27 and from 258 to 115 for females during the same period. The estimated PYPLL for adult  
28 males has increased by 13% and by 32% in 30-45 age group. The standardized rate of  
29 WYPLL has declined from 274 to 131 for males and from 295 to 901 for females. The age  
30 pattern of these indices suggests significant improvement in early childhood mortality and  
31 increasing trends for adult males for 30-45 age group. The standardised rate of YPLL and  
32 WYPLL for male and female was highest for cardiovascular disease.

33  
34  
35  
36  
37  
38  
39  
40  
41 Conclusion: The increasing share of premature deaths among adults and high level of  
42 premature mortality suggest continuation of National Rural Health Mission (NRHM) and  
43 increasing programmatic attention on prevention and treatment of non-communicable  
44 diseases to save premature deaths in India.

**Background:** ~~mortality~~ Demographic and epidemiological transition in India has resulted in large working age population and rise in non-communicable diseases at a faster pace than predicted. Early onset of non-communicable diseases are primarily affecting the working age population those are premature and avoidable. Using data from multiple sources, this paper examines estimates the age and sex pattern of premature mortality in India.

Formatted: Line spacing: Double

**Methods:** The premature mortality is measured with a set of indices: years of potential life lost (YPLL), premature years of potential life lost (PYPLL) and working years of potential life lost (WYPLL). All the indices were standardised, and their corresponding rates have been calculated for broad age groups from 1991 to 2011 and also by selected causes of death for 2002.

Formatted: No underline, Underline color: Auto, Pattern: Clear

**Results:** During 1991-2011, (per 1000 population) the age standardized rate of YPLL had declined from 310 to 235.2 for male and from 307 to 206 for females per 1000 population. The standardized PYPLL (per 1000 population in 0-65 age) has declined from 259.4 to 136.9 for males and from 257.6 to 115.2 for females during the same period. and The standardized WYPLL has declined from 274.2 to 130.7 for males and from 294.8 to 90.6 for females. Though the age pattern of these indices suggests significant improvement in early childhood mortality, PYPLL and WYPLL both are maximally contributed by the age group 0-4 years among both male and female. Afterwards, it decline in the age group 5-14 years but again increases among adults e.g. 15-65 years. for In 2002, the WYPLL due to cardiovascular diseases was 265.7 million among males and 154.7 million among female.

Formatted: No underline, Underline color: Auto, Pattern: Clear

**Conclusion:** The increasing share of premature mortality among adults and high level of premature mortality warrants continuous scrutiny of the existing programmes like National Rural Health Mission (NRHM), Maternal and Child Health (MCH) etc. and increasing attention slower pace of decline in overall premature mortality during 1991-2011 warrants the urgent need to devise strategies on prevention and treatment of non-communicable diseases

Formatted: Font: Times New Roman

1  
2  
3  
4  
5  
6  
7 ~~to save premature deaths in India.~~ **Keywords:** [Premature mortality](#), [YPLL](#), [PYPLL](#), [WYPLL](#),

8 [Causes of death](#)

9  
10  
11  
12  
13  
14 **Strengths and limitations of this study:**

15  
16 This is the first ever study that provides the [trends in](#) standardised estimates of premature  
17 mortality (YPLL, PYPLL and WYPL) by age and sex in India ~~over two decades~~. It also  
18 estimated~~s~~ the standardised indices by cause of death. However, the study ~~has two main~~  
19 ~~limitations. First, it could not analyse the trends and state~~ pattern in cause specific estimates  
20 ~~for the states of India due to unavailability of reliable data over time. could not provide the~~  
21 ~~state level estimates of the indices as the data on cause of death was available only at national~~  
22 ~~level. Second, the trends in cause specific estimates could not be carried out due to data~~  
23 ~~constraints.~~  
24  
25  
26  
27  
28  
29  
30  
31  
32  
33  
34  
35  
36  
37  
38  
39  
40  
41  
42  
43  
44  
45  
46  
47  
48  
49  
50  
51  
52  
53  
54  
55  
56  
57  
58  
59  
60

## Age and sex pattern of premature mortality in India

### Introduction

Premature mortality by age 60 years accounts one-third of the total deaths in low and middle income countries in 2008 [1] (WHO, 2008). While the share of under-five mortality in premature mortality remained high in selected countries, the share of adult mortality is on the rise. The higher level of premature mortality is ~~Premature mortality accounts one third of the total deaths in developing countries (REF). While the share of under five mortality remained high in selected countries, the share of adult mortality is on the rise.~~ Prevention of premature deaths and improving the adult health is increasingly the major public health challenges in developing world. This is ~~mainly~~ largely mainly due to the demographic and epidemiological transition that has altered the level of mortality and disease pattern across the age groups [2, 3]. The Non-communicable Diseases (NCDs) are the leading cause of death and ~~it is~~ primarily affecting the working age group [4, 5]. Studies suggest that premature deaths and hospitalisation adversely affects economic growth and development [6-8]. ~~The estimated loss of GDP in 2004 due to Cardiovascular Disease (CVD) alone was about one trillion in India~~ [8].

~~Mahal [7] estimated one trillion rupees loss of GDP in 2004 due to Cardiovascular Disease (CVD) in India.~~

The concept of premature mortality was evolved to measure the increasing social and economic cost of mortality at younger age because the conventional measure such as crude death rate and age specific death rate does not quantify the extent of life years lost at early ages [9]. ~~The premature mortality is the best single proxy measure for reflecting differences~~

Formatted: Line spacing: Double

Formatted: Font: Not Bold, Not Highlight

Formatted: No underline, Underline color: Auto, Pattern: Clear

Formatted: Font: Rupee Foradian

Field Code Changed

Formatted: Not Highlight

Formatted: Not Highlight

Formatted: Font: Times New Roman

1  
2  
3  
4  
5  
6  
7 in the health status of the state's populations [10]. A number of measures ~~have been~~ ~~are~~ ~~were~~  
8 developed and used to quantify the extent of premature mortality; ~~e.g.~~ ~~These includes~~  
9 ~~preferably~~ potential years of the life lost (PYLL), premature years of potential life lost  
10 (PYPLL), the working years of potential life lost (WYPLL) and the valued years of potential  
11 life lost (VYPLL). Each of the method is a function of age at ~~death~~ ~~death and~~ ~~and~~ the number  
12 of deaths at that age [11] ~~but~~ ~~However, they varied~~ with respect to weight and upper and  
13 lower limit of the age, and weight given to each age. Though many new indices have been  
14 developed to measure the premature mortality like DALY (Disability adjusted life years),  
15 HALY (Health adjusted life years), YLL (Years of life lost) etc., these are based on a number  
16 of assumptions and suffers from data limitations in Indian context. On the other hand, the  
17 YPLL, PYPLL and WYPLL capture the premature mortality as it is based on fewer  
18 assumptions and data input.  
19  
20  
21  
22  
23  
24  
25  
26  
27  
28  
29  
30  
31  
32

33 The potential years of life lost (PYLL) is the most commonly used indicator to quantify  
34 premature mortality. A large number of studies estimated the PYLL to rank the cause of  
35 death and understand level, pattern and differentials in mortality by income, gender, ethnic  
36 groups and regions. Ranking of the major cause of premature mortality using PYLL revealed  
37 that accidents (38.66%) accounts for largest PYLL followed by circulatory system (24.85%)  
38 and Neoplasms (15.67%) in Canada [12]. The PYLL varies largely among OECD countries  
39 and by sex. Among the females, the estimated PYLL (per 1000) was highest in Russian  
40 Federation (7.1) and lowest in Iceland (1.5). Among males, the PYLL was 20.2 in Russia  
41 and 3.0 in Iceland [13]. Using mortality data over four decades, studies found absolute and  
42 relative decline in premature mortality across socio-economic and racial/ethnic group during  
43 the early period (1966-80) and widening relative health inequalities in the subsequent period  
44  
45  
46  
47  
48  
49  
50  
51  
52  
53  
54



(1980-2002) [14]. The large health disparities between African American and other ethnic groups in San Francisco were estimated using expected years of life lost. With respect to gender, the estimated years of life lost among males were 73,627 and 51,194 among females. The estimated the premature deaths by cause in developing countries showed ( ) as the major cause of death [15]. The leading causes of premature deaths were HIV/AIDS followed by suicide and drug overdose among males and lung cancer, breast cancer and hypertensive heart diseases among females [15]. Studies also suggests that the association between income and premature mortality (deaths before age 75) was stronger among low-income counties compared to high-income counties. Among various income group, The premature mortality varies by geographic, socio-demographic, racial/ethnic and behavioral factors among income groups [15].

The potential years of life lost (PYLL) is the most commonly used indicator to quantify premature mortality. A large number of studies estimated the PYLL to rank the cause of death and understand level, pattern and differentials in mortality by income, gender, ethnic groups and regions. Romeder and McWhinnie [10] rank the major cause of premature mortality by focussing on PYLL in age group 1 and 70 and found that accidents (38.66%) accounts for the maximum PYLL followed by circulatory system (24.85%) and Neoplasms (15.67%). The level, pattern and cause of adult mortality in selected developing countries has been estimated, also the YPLL using an age weight of 85 years minus the age at death [11]. The Organisation of Economic Cooperation and Development [12] measured premature mortality with the help of potential years of the life lost (PYLL) before age 70 years for its member nations and found highest PYLL in Russian Federation (20161 per thousand males for male and 7056 per thousand females for female) and lowest in Iceland (2995 per thousand males and 1492 per thousand females). The reduction in PYLL was highest in Mexico (13587 per thousand populations) during 1970-2009 and gender differentials have been found. According to a

Formatted: Highlight

Formatted: Font: Times New Roman

report issued by the US General Accounting Office in 1996, “premature mortality is the best single proxy for reflecting differences in the health status of state’s populations”[13]. The potential years of life lost (PYLL) is the most commonly used indicator to quantify premature mortality. In 2009, the PYLL was 201 per 1000 males in Russian Federation (highest) followed by Newzeland (89). The gender differentials are large, higher for male than females (71 per 1000 females in Russian Federation and 28 in Newzeland). A study on the fall and rise in inequalities in premature mortality (death before the age 65) in United States of America (USA) for 1960-2002 found that the premature mortality and infant mortality decreased for all income groups. Had all persons in US experienced the same yearly age specific premature mortality rates as the white population living in the highest income quintile, between 1960 and 2002, 14% of the white premature deaths and 30% of the premature deaths among populations of color would not have occurred.[14]. The expected years of life lost has been estimated to rank the leading cause of deaths in San Francisco[15] and found Large health disparities between African American and other ethnic groups were found. In the years 2003-2004, 6312 men died (73,627 years of life lost), and 5726 women died (51,194 years of life lost). The leading causes of premature deaths are those with the largest average YLLs and are largely preventable. Among men, these were HIV/AIDS, suicide, drug overdose, homicide, and alcohol use disorder; and among women, these were lung cancer, breast cancer, hypertensive heart disease, colon cancer, and diabetes mellitus. A study also suggests that the association between income and premature mortality was stronger among low income counties than high income counties. It has been also found that the differences in the pattern of risk factors between high and low income groups. Significant geographic, sociodemographic, racial/ethnic, health care, social, and behavioral disparities exist among income groups. Disparities in premature mortality between high and low income countries and found strong association of income and premature mortality in low

**Formatted:** Font: (Default) Times New Roman, 12 pt

**Field Code Changed**

**Formatted:** Font: (Default) Times New Roman, 12 pt

**Formatted:** Font: Times New Roman

1  
2  
3  
4  
5  
6  
7 ~~income countries than high income countries and the risk factors are different for each~~  
8 ~~group~~[16].

9  
10  
11  
12 Like other developing countries, India is also experiencing rapid demographic and  
13 epidemiological transition. While the total fertility rate is close to replacement level, the life  
14 expectancy has reached ~~to~~ 64.6 years for male and 67.7 years for female by 2008 [16]. There  
15 has been a significant reduction ~~inof~~ under-five ~~mortalitydeaths~~ in last ~~two~~ decades;~~declined~~  
16 from 2.5 million in 2001 ~~to~~ 1.5 million in 2012 [17, 18]; ~~per 1000 live births (REF)~~. During  
17 1991 and 2010~~1~~, the share of under-five deaths to total deaths has declined from 35% to 17%  
18 while that of adult deaths (deaths in 15-59 years) has increased from 27% ~~to~~ 30%  
19 [19]~~(Thesis-ref)~~. On the ~~othe~~r hand, the NCDs are the leading cause of mortality and  
20 morbidity in India. The non-communicable diseases (NCDs) account for 62% of the total  
21 burden of foregone DALYs and 53% of total deaths in India [20]. ~~Among all NCDs, 9.2~~  
22 million productive life lost in India in 2000 due to CVD among 35-64 years age group were  
23 estimatedand projected to 17.9 million by 2030 [17]. ~~T~~he cardiovascular deaths  
24 (cardiovascular deaths (CVDs) ~~CVDs~~)was estimated at 1.4 million (56.2% in 25-69 age  
25 group) in 2004 and projected at 2.1 million (45% in 25-69 age group) by 2021 [21]. The  
26 hospitalisation rate and outpatient visit due to NCDs rose from 32% to 40% and 22% to 35%,  
27 respectively, ~~within a decade from~~ during 1995 to 2004 [20]. The CVDs accounted loss of 9.2  
28 million productive life among 35-64 years age group in 2000 and projected at 17.9 million  
29 by 2030 [22]. Though a large number studies has been carried out on trends, differentials  
30 and determinant of mortality, there is no study that examined the premature mortality in India  
31 [23-26]~~(REF-)~~. In this context it is necessary to understand the extent of avoidable deaths  
32 among working population in India.

Formatted: Highlight

Formatted: Font: Times New Roman

1  
2  
3  
4  
5  
6  
7 Like other developing countries, India is also experiencing rapid demographic and  
8 epidemiological transition. While the total fertility rate is close to replacement level, the life  
9 expectancy has reached to 64.6 years for male and 67.7 years for female by 2008 [20]. There  
10 has been a significant reduction of child mortality in last two decades. The share of child  
11 mortality to total deaths has declined from 35% in 1991 to 17% by 2011. However, the share  
12 of adult deaths (deaths between 15-59 years) is on the rise though the probability of death  
13 between 15-59 years has declined over time. The Non-communicable diseases are the leading  
14 cause of mortality and morbidity. In this context, this The aim of this paper is to  
15 examine the age and sex pattern of premature mortality in India over last two  
16 decades (1991-2011). It also estimates the extent of premature mortality by selected causes of  
17 death for 2002. The paper has been conceptualised with the following rationale. First,  
18 evidence suggests increase in adult mortality in India, which are premature and avoidable.  
19 the on going demographic and epidemiological transition in India has altered the disease  
20 pattern and The also the social, psychological and economic costs associated with premature  
21 deaths are devastating. The NCDs are the leading cause of deaths which are more prevalent  
22 among adults. Hence prevention of these deaths must be a public health priority. Second, the  
23 NCDs are the leading cause of death, and the onset of NCDs in India is 10-15 years earlier  
24 than that of developed countries. These deaths are primarily affecting the working age group  
25 which results into rise in premature mortality. On the other hand, and the public health  
26 centers public health system centres in India are not equipped enough to treat the NCDs. Third,  
27 though the premature mortality has been extensively studied in developed countries, there is  
28 no study that has estimated the level and trend of premature mortality in India. The  
29 quantification of premature mortality helps to identify the social and economic cost  
30 associated with mortality, ranks the disease burden and has greater policy relevance. In this

Formatted: Not Highlight

Formatted: Font: Times New Roman

1  
2  
3  
4  
5  
6  
7 context, this paper provides the numerical estimates on the premature deaths in India over  
8  
9 time and by causes of death for broad age group.

### 10 11 12 **Data and methods**

13  
14 This paper uses data from multiple sources; the census of India, 1991, 2001 and 2011, the  
15  
16 sample registration system (SRS), 1991-2011 and report on cause of death, 2001-03 [27-  
17  
18 31]. ~~This paper used published data and does not have any ethical issues. This is an  
19  
20 independent research and did not get any funding.~~ The Indian census is the largest single  
21  
22 source of information on demographic and selected socio-economic ~~different~~ characteristics  
23  
24 of the population of India. We have used the age and sex distribution of the population for  
25  
26 1991, 2001 and 2011 ~~census and the intercensal population for 1996 and 2006. T and the age-~~  
27  
28 sex distribution of intercensal periods (1996 and 2006) ~~are borrowed~~ taken from SRS. Medical  
29  
30 Certification of Cause of Deaths (MCCD) is another source of information available in India  
31  
32 but due to the very low coverage of deaths (maximum ....% in Maharashtra), it is not suitable  
33  
34 for a representative analysis.

35  
36  
37 ~~The d~~ Data on causes of death is extremely useful for planning of health programmes and for  
38  
39 planning evidence-based ~~interventionist~~ strategies ~~in the country~~. The special survey of deaths  
40  
41 (SSD) was jointly undertaken by the Office of the Registrar General, India (ORGI) and the  
42  
43 Centre for Global Health Research (CGHR) and University of Toronto [27] ~~SRS in early in~~  
44  
45 ~~2004-05, using an advanced form of verbal autopsy, for the period 2001-03. The Office of~~  
46  
47 ~~the Registrar General, India (ORGI) has prepared this Report jointly with the Centre for~~  
48  
49 Global Health Research (CGHR), St. Michael's Hospital, and University of Toronto [21]. ~~The~~  
50  
51 ~~grouping for the Causes of Death is as per the World Health Organisation (WHO)~~  
52  
53 guidelines. The SSD was implemented during 2004-05 covering ~~a~~ 10.114 million deaths from  
54

1  
2  
3  
4  
5  
6  
7 1.1 million households, which have been recorded during 2001-2003 in Sample Registration  
8 System (SRS) [27]. The causes of death ~~have been~~ was/were determined using an advanced  
9 form of Verbal Autopsy called the “RHIME” or Representative, Re-sampled, Routine  
10 Household Interview of Mortality with Medical Evaluation method. ~~The cases resulting into~~  
11 ~~continuing disagreements were referred to a third physician to adjudicate the final ICD-10~~  
12 ~~code.~~ We have used data on the distribution of deaths by age, sex and cause from this report to  
13 estimate the premature mortality ~~due to individual causes of death.~~ We may mention that,  
14 besides these sources, the vital registration system and the Medical Certification of Cause of  
15 Deaths (MCCD) provides the deaths by age, sex and selected characteristics, However, the  
16 vital registration system in India is incomplete and have limited used for analyses [32]  
17 ~~(REF).~~ The is a MCCD also have very low coverage and it is not suitable for a representative  
18 analysis [33]. ~~(REF)~~ no other source of information available in India but due to the very low  
19 coverage of deaths (maximum ....% in Maharashtra), it is not suitable for a representative  
20 analysis.  
21 This data used is approximately thirteen years old, but since the proportion of death has not  
22 changed significantly, the results are valid and useful in the current scenario. (I will compare  
23 with GBD, 2010)

### Methodology

24  
25  
26  
27  
28  
29  
30  
31  
32  
33  
34  
35  
36  
37  
38  
39  
40  
41  
42  
43  
44  
45  
46  
47 This paper use three indices, namely, the YPLL, PYPLL and WYPL and .the standardised  
48 rates to understand the ~~have been used to quantify the extent of~~ -premature mortality in India.  
49 In case of standardised rates, the age distribution of Kerala, 2011 is used as the  
50 reference reference population because the Kerala is demographically advanced state of India.

Formatted: Highlight

Formatted: Highlight

Formatted: Font: Times New Roman

The three year moving average of the ASDR is used. Age group 15-65 years is referred as adult age. The analysis has been carried out for India. The method of computing each of the indices is given below as described below:

#### a. Years of Potential Life Lost (YPLL)

The potential years of life lost (YPLL) is a summary measure of premature mortality that gives higher weight to deaths occurring at younger age and lower weight to the deaths at higher ages. It involves estimating the average time years a person would have lived had he or she not died prematurely[11]. The method used in this study is given by:

$$YPLL = \sum_{i=0}^{\infty} d_i * L_i \quad \text{--- (1)}$$

Where  $L_i$  is the life expectancy at age  $i$ ,  $d_i$  is the number of deaths at age  $i$ . The deaths are are weighted by life expectancy at each age.

The standardised YPLL and corresponding rates have been calculated as follows[12]:

$$\text{Standardized YPLL} = YPLL * \left(\frac{P_{tr}}{N_r}\right) * \left(\frac{N}{P_i}\right) \quad \text{--- (2)}$$

Where  $P_{tr}$  is population in the  $i^{\text{th}}$  age group in the reference population (Kerala);

$N_r$  is the total reference population (Kerala)

$N$  is the total study population;

$P_i$  is the population in the  $i^{\text{th}}$  age group in the study population.

$$\text{Rate of YPLL} = \frac{\sum YPLL}{N} * 1000 \quad \text{(3)}$$

#### b. Premature years of potential life lost (PYPLL)

The PYPLL measures the loss of years of productive life due to death before a cut-off age. The upper age limit on estimating PYLL varies by countries and authors. Different age limit could be taken to define premature death, however many studies have considered death before age 65 years as premature death<sup>[11]</sup>. We have used the upper age limit of 65 years close to the average longevity in India

Formatted: Font:

Formatted: Line spacing: Double

Formatted: Font:

Formatted: Font:

$$PYPLL = \sum_{i=0}^{UN} d_i * (UN - i) \quad \text{--- (4)}$$

where  $d_i$  is the number of deaths at age  $i$ ,

$U$  is the We have used 65 as the upper cut-off limit of age (65 years).

Formatted: Font:

Formatted: Line spacing: Double

In each age, the deaths are weighted by difference in upper age limit and age at death.

$$\text{Standardized PYPLL} = PYPLL * \left(\frac{P_{i,r}}{N_r}\right) * \left(\frac{N}{P_i}\right) \quad \text{--- (5)}$$

where  $P_{i,r}$  is the population in the  $i^{\text{th}}$  age group in the reference population (taken as Kerala);

$N_r$  is the total reference population in age group 0 to 65 (taken as Kerala);

$N$  is the total study population in age group 0-65;

$P_i$  is the population in the  $i^{\text{th}}$  age group in the study population.

$$\text{Rate of PYPLL} = \frac{\sum PYPLL}{N} * 1000 \quad \text{--- (6)}$$

where  $N$  is the total population in age group 0 to 65.

### c. Working years of potential life lost (WYPLL)

The WYPLL measures the working life years lost during “the working age period” in a population.

Formatted: Line spacing: Double

$$WYPLL = \sum_{i=0}^{W-1} d_i * (U - W) + \sum_{i=W}^N d_i * (U - i) \quad \text{--- (7)}$$

Formatted: Left

where  $d_i$  is the number of deaths at age  $i$ ,

$U$  is the upper cut off age (65 years);

Formatted: Font: Times New Roman



W is the lower cut-off age (14 years).

~~In computing the WYPLL, the lower limit of 14 and upper limit of 65 is taken.~~

Here a constant weight is assigned to the deaths before age 14 years; difference in upper and lower age cut-off and deaths at age 14 and above are weighted by difference between upper age limit and age at death.

$$\text{Standardized WYPLL} = \text{WYPLL} * \left(\frac{P_{L,r}}{N_r}\right) * \left(\frac{N}{P_i}\right) \quad (8)$$

~~W~~where  $P_{i,r}$  is population in the  $i^{\text{th}}$  age group in the reference population (taken as Kerala);

$N_r$  is the total reference population in age group 0 to 65 (taken as Kerala);

$N$  is the total study population in the age group 0 to 65;

$P_i$  is the population in the  $i^{\text{th}}$ -age group in the study population.

$$\text{Rate of WYPLL} = \frac{\sum \text{WYPLL}}{N} * 1000 \quad (9)$$

~~W~~where  $N$  is the total study population in the age group 0 to 65 years.

~~The estimated population and deaths by age and sex over 1991-2011 is shown in Appendix 1 and 2. Kerala is demographically most advance state of India with lowest mortality level, that's why it is assumed as a reference or goal for India.~~

### Cause specific indices of premature mortality

~~We have also computed the YPLL, PYPLL and WYPLL were calculated~~ for selected causes of death using the similar methods and weighting procedure above methods for 2002. The ~~distribution of deaths by diseases specific deaths are taken from the distribution of death by~~ cause, age and sex and taken from Report on Causes of Death, RGI, 2001-03. The weighting assigned for each age group is inbuilt in the each of the indices. In general, in each of the method, the younger age groups gets a higher weight age and the older age group gets a lower weightage.

Formatted: Font:

Formatted: Line spacing: Double

Formatted: Font:

Formatted: Font:

Formatted: Line spacing: Double

Formatted: Font: Times New Roman

Funding and Ethical Issues:

It is an independent research and did not receive any funding. We have used published data and it does not involve any ethical issues.

Formatted: Font: Not Bold

Formatted: Line spacing: Double

Formatted: Font:

Results

Results are presented in two sections. Section 1 describes the ~~level and~~ trend of premature mortality by age and sex and section 2 ~~describes~~ presents the estimated years of premature deaths by causes of death.

Formatted: Font: Not Bold

Formatted: Line spacing: Double

Section 1: Trends in Indices of Ppremature Mmortality by age and sex, 1991-2011

YPLL, PYPLL and WYPLL

Table 1 presents the standardized YPLL in millions for a period of two decades (1991-2011) by broad age group and sex. During 1991-2011, the YPLL has increased from 134.4 million to 146.67 million among males while it has declined from 123.2 million to 108.9 million among females. The rate of YPLL has declined from 310 to 235.2 per 1000 population for males and from 306.97 to 206 for females in the same period. Though the overall decline in YPLL reflects the marked improvement in mortality in the population, it conceals large discrepancies in broad age group. The decline in YPLL was significant among younger age group, particularly among children while it has ~~remained similar or~~ increased among adults (15-64 years). Among children under five years of age, the YPLL has declined by 38% for male and 32% for females from 56.3 in 1991 to 35 by 2011 for male while among female it has declined from 53.1 to 36.3 among female in the same period. Among adults (in 15-64 age groups), the YPLL has increased during 1991-2011 for males in most of the all the age group. ~~For example~~ during 1991-2011, in 60-70 age group the YPLL for males in 30-45 age group has increased by 48% and for 45-59 it has from 13.4 million to 20 million and from 12.6 to

Formatted: Space After: 0 pt, Line spacing: Double

Formatted: Font: Times New Roman

18.7 million in the 30-45 age group. The YPLL has increased from 22.5 million in 1991 to 28.2 million by 2011 in the 45-59 age group increased by 25%. Among adult females, the largest decline in YPLL has declined was in the age group 15-45 and increased in the age group 60-70. Though the absolute value of YPLL has increased during 1991-2011, the rate of YPLL has declined. Though the YPLL has declined largely for 0-4 year, it remains highest in this age group. The YPLL has not shown secular decline; had initially increased during 1991-2001 and declined thereafter. With respect to elderly, the rate of YPLL has declined from 10.5 in 1991 to 26.8 by 2011 for males and 11.5 to 27.4 for females.

**Table 1: Trends in years of potential life lost (YPLL) in million (standardised) by age and sex and rate of YPLL (per 1000 population) in India, 1991-2011**

| Age group       | 1991  |        | 1996  |        | 2001  |        | 2006  |        | 2011  |        | Percentage reduction (1991-2011) |        |
|-----------------|-------|--------|-------|--------|-------|--------|-------|--------|-------|--------|----------------------------------|--------|
|                 | Male  | Female | Male                             | Female |
| YPLL in million |       |        |       |        |       |        |       |        |       |        |                                  |        |
| 0-4             | 56.3  | 53.1   | 50.2  | 48.0   | 62.3  | 60.4   | 45.0  | 41.5   | 35.0  | 36.3   | 37.8                             | 31.6   |
| 5-14            | 7.8   | 7.9    | 7.9   | 8.3    | 7.3   | 7.0    | 7.2   | 6.8    | 5.6   | 5.0    | 28.2                             | 36.7   |
| 15-29           | 10.9  | 13.2   | 11.3  | 13.0   | 13.1  | 14.7   | 13.1  | 12.9   | 12.2  | 11.2   | -11.9                            | 15.2   |
| 30-45           | 12.6  | 11.9   | 14.4  | 12.5   | 17.4  | 13.6   | 18.2  | 12.5   | 18.7  | 10.6   | -48.4                            | 10.9   |
| 45-59           | 22.5  | 14.9   | 24.6  | 17.2   | 28.1  | 18.7   | 26.5  | 16.7   | 28.2  | 16.9   | -25.3                            | -13.4  |
| 60-70           | 13.4  | 10.8   | 17.1  | 13.5   | 18.4  | 14.6   | 18.6  | 15.0   | 20.0  | 15.1   | -49.3                            | -39.8  |
| 70+             | 10.5  | 11.5   | 20.2  | 23.0   | 18.4  | 12.4   | 23.8  | 50.5   | 26.8  | 30.7   | -155.2                           | -167.0 |
| 0-14            | 64.1  | 60.9   | 58.1  | 56.2   | 69.5  | 67.4   | 52.2  | 48.3   | 40.7  | 15.1   | 36.5                             | 75.2   |
| 15-65           | 52.7  | 45.1   | 59.9  | 49.8   | 67.7  | 53.8   | 68.1  | 49.9   | 69.6  | 57.8   | -32.1                            | -28.2  |
| Total           | 134.1 | 123.2  | 145.7 | 135.3  | 165   | 141.3  | 152.5 | 155.8  | 146.6 | 107.9  | -9.3                             | 12.4   |
| YPLL Rate       | 310.0 | 306.9  | 302.8 | 302.4  | 311.0 | 285.4  | 264.6 | 288.8  | 235.2 | 206.0  | 24.1                             | 32.9   |

Table 2 provides the premature years of potential life lost (PYPLL) by age and sex in last two decades. The PYP \_\_\_\_\_ LL fixes an upper limit to which individual are expected to survive and measures the loss of years of productive life due to death before a selected cut-off age. During 1991-2011, the estimated PYPLL for male has declined from 1087.7 to 809.1 million while that of females has declined from 99.1 to 63.84 million. -The rate of PYPLL among males has declined from 259.4 in 1991 to 224.2 in 2001 and further to 136.97 by

Formatted: Space After: 12 pt, Line spacing: 1.5 lines

Formatted: Line spacing: Double

Formatted: Font: Times New Roman

2011. Among females, the rate of PYPLL has declined from 25~~87.6~~ in 1991 to 21~~32.9~~ in 2001 and 115.2 in 2011. The decline in PYPLL is faster among females compared to males. ~~The differentials in PYPLL by age groups suggest that the decline is largely contributed by younger age group, particularly children under five years of age.~~ During 1991-2011, the YPLL among children under five years of age has declined from 6~~43.8~~ million years to 3~~54.9~~ million years for male and from 60.4 million to 34.5 million years for females. The decline was secular for both male and females. On the other hand, in age group (15-65), the PYPLL has declined for females but not for males. The PYPLL for males in the age group 30-45 has increased from 1~~10.8~~ million years to 14.2 million years ~~and that for 45-59 it has increased from 13.6 million to 14.4 million years.~~ ~~Much of the gain in PYPLL was due to improvement in younger ages (below age 15 years and less at adult ages.)~~ In all the years studied, the PYPLL among males was highest in 0-4 age group followed by age group 45-59 years. Similarly for females the PYPLL was highest in 0-4 age group followed by 15-29 age group. ~~The PYPLL was increased by 13% among adult males and declined by 20% among adult females. The increase in PYPLL among males was highest in the age group 30-45 (32%) followed by 60-65.~~ While declining in PYPLL among children is a good sign, the increase in these indices among adult in the prime working age group is a concern. This is possibly due to increase in non-communicable diseases that are largely affecting the prime working age groups.

**Table 2: Trends in premature years of potential life lost (PYPLL) in million (standardised) by age and sex and rate of PYPLL (per 1000 population) in India, 1991-2011**

| Age group | 1991 |        | 1996 |        | 2001 |        | 2006 |        | 2011 |        | Percentage reduction (1991-2011) |        |
|-----------|------|--------|------|--------|------|--------|------|--------|------|--------|----------------------------------|--------|
|           | Male | Female | Male                             | Female |
| 0-4       | 63.8 | 60.1   | 54.0 | 51.2   | 65.5 | 61.9   | 46.1 | 41.1   | 34.9 | 34.5   | 45.3                             | 42.6   |
| 5-14      | 7.8  | 7.7    | 7.5  | 7.7    | 6.7  | 6.4    | 6.7  | 6.0    | 5.1  | 4.3    | 34.6                             | 44.2   |
| 15-29     | 10.4 | 12.2   | 10.2 | 11.3   | 11.7 | 12.3   | 11.5 | 10.7   | 10.5 | 9.0    | -1.0                             | 26.2   |
| 30-45     | 10.8 | 9.6    | 11.6 | 9.4    | 13.6 | 9.9    | 14.0 | 8.9    | 14.2 | 7.3    | -31.5                            | 24.0   |
| 45-59     | 13.6 | 8.5    | 13.4 | 8.7    | 14.5 | 8.8    | 13.7 | 7.8    | 14.4 | 7.6    | -5.9                             | 10.6   |
| 60-65     | 1.3  | 0.9    | 1.6  | 1.1    | 1.4  | 1.0    | 1.6  | 1.1    | 1.6  | 1.0    | -23.1                            | -11.1  |
| 0-14      | 71.6 | 67.8   | 61.5 | 58.9   | 72.2 | 68.3   | 52.8 | 47.1   | 40.0 | 38.8   | 44.1                             | 42.8   |
| 15-65     | 36.1 | 31.2   | 36.8 | 30.5   | 41.2 | 32.0   | 40.8 | 28.5   | 40.7 | 24.9   | -12.7                            | 20.2   |

Formatted: Font: Times New Roman

|                   |  |              |              |              |              |              |              |              |              |              |              |             |             |
|-------------------|--|--------------|--------------|--------------|--------------|--------------|--------------|--------------|--------------|--------------|--------------|-------------|-------------|
| <b>Total</b>      |  | <b>107.7</b> | <b>99.1</b>  | <b>98.3</b>  | <b>89.4</b>  | <b>113.6</b> | <b>100.1</b> | <b>93.6</b>  | <b>75.5</b>  | <b>80.9</b>  | <b>63.8</b>  | <b>24.9</b> | <b>35.6</b> |
| <b>WYPLL Rate</b> |  | <b>259.4</b> | <b>257.6</b> | <b>212.6</b> | <b>208.8</b> | <b>224.2</b> | <b>212.9</b> | <b>170.0</b> | <b>147.0</b> | <b>136.9</b> | <b>115.2</b> | <b>47.2</b> | <b>55.3</b> |

Table 3 presents the working years of potential life lost (WYPLL) by age and sex for last two decades. The WYPLL gives a higher weightage to working age population. During 1991-2011, the WYPLL has declined from 1143.84 million to 77.2 million among males and from 113 million to 45 million among females. The rate of WYPLL has declined from 274.2 in 1991 to 1310.7 per 100 for males. Among females, the rate of WYPLL has declined from 2954.8 in 1991 to 910.6 in 2011. The estimate Distribution of WYPLL by age over the period of time shows a similar pattern as that of YPLL. Among females, the WYPLL has declined over all age group while for males it has declined only for younger age group. Among males aged 30-45 years, the WYPLL has increased from 9 million years in 1991 to 13.4 million years by 2011. The WYPLL was higher among females compared to males at all age group. The standardisation of WYPLL does not change the gradient across age and sex over the period of time but level has changed.

**Table 3: Trends in working years of potential life lost (WYPLL) in million (standardised) by age and sex and rate of WYPLL (per 1000 population) in India, 1991-2011**

| Age group         | WYPLL in million | 1991         |              | 1996         |              | 2001         |              | 2006         |              | 2011         |             | Percentage reduction (1991-2011) |             |
|-------------------|------------------|--------------|--------------|--------------|--------------|--------------|--------------|--------------|--------------|--------------|-------------|----------------------------------|-------------|
|                   |                  | Male         | Female       | Male         | Female       | Male         | Female       | Male         | Female       | Male         | Female      | Male                             | Female      |
| 0-4               |                  | 73.4         | 76.9         | 61.3         | 63.0         | 72.3         | 74.8         | 47.9         | 46.0         | 34.0         | 36.4        | 53.7                             | 52.7        |
| 5-14              |                  | 10.3         | 11.4         | 9.8          | 10.9         | 8.7          | 8.9          | 8.0          | 7.8          | 5.7          | 5.3         | 44.7                             | 53.5        |
| 15-29             |                  | 8.7          | 10.0         | 8.5          | 9.3          | 10.0         | 10.2         | 10.2         | 9.3          | 9.7          | 8.1         | -11.5                            | 19.0        |
| 30-45             |                  | 9.0          | 7.7          | 9.7          | 7.8          | 11.6         | 8.3          | 12.4         | 7.7          | 13.1         | 6.5         | -45.6                            | 15.6        |
| 45-59             |                  | 11.4         | 6.8          | 11.3         | 7.1          | 12.4         | 7.2          | 12.2         | 6.8          | 13.2         | 6.8         | -15.8                            | 0.0         |
| 60-65             |                  | 1.1          | 0.8          | 1.4          | 0.9          | 1.2          | 0.8          | 1.4          | 1.0          | 1.5          | 0.9         | -36.4                            | -12.5       |
| 0-14              |                  | 83.7         | 88.3         | 71.1         | 73.9         | 81.0         | 83.7         | 55.9         | 53.8         | 39.7         | 41.7        | 52.6                             | 52.8        |
| 15-65             |                  | 30.2         | 25.3         | 30.9         | 25.1         | 35.2         | 26.5         | 36.2         | 24.8         | 37.5         | 22.3        | -24.2                            | 11.9        |
| <b>Total</b>      |                  | <b>113.8</b> | <b>113.0</b> | <b>102.2</b> | <b>99.0</b>  | <b>116.3</b> | <b>110.0</b> | <b>92.1</b>  | <b>78.0</b>  | <b>77.2</b>  | <b>45.0</b> | <b>32.2</b>                      | <b>60.2</b> |
| <b>WYPLL Rate</b> |                  | <b>274.2</b> | <b>294.8</b> | <b>220.9</b> | <b>231.5</b> | <b>229.6</b> | <b>234.3</b> | <b>167.3</b> | <b>152.8</b> | <b>130.7</b> | <b>90.6</b> | <b>52.3</b>                      | <b>69.3</b> |

## Section 2: YPLL, PYPLL and WYPLL Premature mortality by causes of death

Table 4 and figure 1, 2 and 3 presents the indices of premature mortality by causes of death for male and female. ~~Given the increase in adult mortality, w~~We have taken top nine causes of death among adults and computed ~~the indices of premature mortality~~ YPLL, PYPLL and WYPLL. These indices were ~~limited~~ ~~estimated to~~ ~~for~~ the year 2002 because the causes of death data were available only for this period. Among the nine leading causes of death, the CVD account for maximum loss in YPLL and WYPLL.

The WYPLL among males was 265.7 million due to CVDs, ~~followed by~~ 12.1 million due to Tuberculosis and 11.5 million due to Diarrheal diseases. The rate of WYPLL among males was also maximum for CVDs (5049.6) followed by Tuberculosis (23.3) and diarrheal diseases (22.2). Similarly, for females, the WYPLL was highest for CVDs (154.7 million) followed by Diarrheal diseases (14.1) and malignant and other neoplasms (8.5). Among males, the YPLL was highest for CVDs (210.7) followed by diarrheal diseases (121.6) and Tuberculosis (9). For females, the YPLL was highest for CVDs (176.8) followed by diarrheal diseases (98.9) and Respiratory diseases (8.1). In terms of PYPLL, among males, the PYPL rate was highest for diarrheal diseases (9.1) followed by CVDs (87.6) and accidents (76.6). In the case of females also, the rate of PYPLL was highest due to diarrheal diseases (11) followed by CVD (4.5) and accidents (4.2). The corresponding rate of the YPLL, PYPLL and WYPLL shows the same trend for the given causes of deaths.

**Table 4: ~~Rate and absolute number~~ Estimates of YPLL, PYPLL and WYPLL and the corresponding rates by cause, in -India, 2002**

| Causes of death               | Rate (per 1000 population) |             |            |        |       |        | Absolute number (million) |            |            |        |       |            |
|-------------------------------|----------------------------|-------------|------------|--------|-------|--------|---------------------------|------------|------------|--------|-------|------------|
|                               | YPLL                       |             | PYPLL      |        | WYPLL |        | YPLL                      |            | PYPLL      |        | WYPLL |            |
|                               | Male                       | Female      | Male       | Female | Male  | Female | Male                      | Female     | Male       | Female | Male  | Female     |
| Tuberculosis                  | 16.7                       | <u>13.0</u> | 9.7        | 7.7    | 23.3  | 14.2   | <u>9.0</u>                | 6.6        | <u>5.0</u> | 3.7    | 12.1  | 6.8        |
| Diarrheal diseases            | 21.4                       | 17.6        | 17.6       | 23.0   | 22.2  | 29.4   | 11.6                      | 8.9        | 9.1        | 11.0   | 11.5  | 14.1       |
| Malaria                       | 7.9                        | 7.8         | 5.9        | 7.2    | 8.8   | 10.4   | 4.3                       | <u>4.0</u> | 3.1        | 3.5    | 4.6   | <u>5.0</u> |
| Malignant and other neoplasms | 11.9                       | 14.6        | 6.2        | 7.1    | 16.4  | 17.8   | 6.4                       | 7.3        | 3.2        | 3.4    | 8.5   | 8.5        |
| CVD                           | 38.2                       | 33.3        | 14.6       | 9.5    | 49.6  | 30.7   | 20.7                      | 16.8       | 7.6        | 4.5    | 25.7  | 14.7       |
| Respiratory diseases          | 15.5                       | <u>16.0</u> | <u>4.0</u> | 3.3    | 18.3  | 13.5   | 8.4                       | 8.1        | 2.1        | 1.6    | 9.5   | 6.5        |
| Digestive diseases            | 9.7                        | 5.9         | 5.9        | 3.8    | 13.2  | 6.9    | 5.2                       | <u>3.0</u> | 3.1        | 1.8    | 6.9   | 3.2        |

1  
2  
3  
4  
5  
6  
7  
8  
9  
10  
11  
12  
13  
14  
15  
16  
17  
18  
19  
20  
21  
22  
23  
24  
25  
26  
27  
28  
29  
30  
31  
32  
33  
34  
35  
36  
37  
38  
39  
40  
41  
42  
43  
44  
45  
46  
47  
48  
49  
50  
51  
52  
53  
54  
55  
56  
57  
58  
59  
60

|                                         |      |      |      |     |      |      |     |     |     |     |     |     |
|-----------------------------------------|------|------|------|-----|------|------|-----|-----|-----|-----|-----|-----|
| Unintentional injuries: Other Accidents | 16.1 | 10.4 | 12.7 | 8.8 | 17.9 | 12.3 | 8.7 | 5.2 | 6.6 | 4.2 | 9.3 | 5.9 |
| Intentional injuries: Suicide           | 7.3  | 7.3  | 5.8  | 5.8 | 8.6  | 7.1  | 3.9 | 3.7 | 3.0 | 2.8 | 4.5 | 3.4 |

Figure 4 and 5 depicts the age pattern of WYPLL for top three causes of death among male and female respectively. ~~It is clear from both the figures that t~~The Diarrheal diseases accounts for ~~the~~ majority of the years lost among children (0-14 years) whereas CVD accounts for the highest life years lost among adults and old population. The adult population is affected by both communicable and non-communicable diseases. ~~For example, among males, CVD and Tuberculosis both~~ are remarkably high in ~~the~~ adult ages. Similarly, among adult females, CVD and Malignant and other neoplasms are leading causes of premature mortality. ~~Hence, the adults of India are facing the dual burden of diseases which leads to the increase in premature mortality and lowering their health status.~~

Formatted: Line spacing: Double

### Discussion and Conclusion

The concept of premature mortality has been used as an important measure of health status and a guide for health policies of many developed countries. Estimating the extent of premature mortality and understanding the factors affecting premature mortality are prerequisiteessential in reducing avoidable mortality and improving the health of the population and. In last two decade, India has made significant progression in reduction of infant and child mortality and improvement in longevity. The increase in ~~thisese~~ health outcome ~~isare~~ evident across socio-economic groups and space. A number of studies have helped ~~us~~ in understanding the differentials, determinants and inequality in infant and child mortality in India [17, 34-36] (REF). However, evidences suggests increasing adult mortality ~~largely~~ and there are limited studies that covered the premature mortality in India. In this

Formatted: Check spelling and grammar

Formatted: Check spelling and grammar

Field Code Changed

Formatted: Check spelling and grammar

Formatted: Check spelling and grammar

Formatted: Check spelling and grammar

Formatted: Font: Times New Roman

1  
2  
3  
4  
5  
6  
7 context, we have attempted to provide the numerical estimates on premature mortality using a  
8 set of indices by age and sex over two decades. We have used the published data from SRS,  
9 special survey on cause of death and estimated the YPLL, PYPLL and WYPLL for broad  
10 age groups. Though the estimates on premature mortality by cause of death are 13 years  
11 old, the inferences will not change because of increasing NCDs. The following are the  
12 salient findings.  
13  
14  
15  
16  
17

Formatted: Font: Not Bold

18  
19  
20 First, we found a decline in premature mortality indices (YPLL, PYPLL and WYPLL) and  
21 their rates for both male and female except YPLL for males. This is consistent with the  
22 overall improvement in health situation of the population. Second, the decline in premature  
23 mortality indices conceals large differential across the age group and sex. While the decline  
24 in premature mortality indices is largely due to improvement in mortality in the younger age  
25 group e.g. 0-14 years, it has indeed increased among male adults. Third, the age pattern of the  
26 indices reveals that the estimates of the premature mortality are continued to be highest in 0-4  
27 age group though the decline was highest in this same age group; – declined by more than  
28 one-third in last two decades. However, all these indices has increased in 35-49 age group  
29 suggesting increasing in premature mortality these indices – adult male mortality.  
30 Fourth, Third, the YPLL and WYPLL was highest due to CVDs for both male and female.  
31 Most of the CVD deaths are premature and affecting the prime working age groups.  
32 Fifth, Fourth, the estimates of PYPLL was highest for Diarrheal diseases followed by CVDs.  
33 This is because the PYPLL gives a higher weightage to children and the diarrheal diseases are  
34 higher among children.  
35  
36  
37  
38  
39  
40  
41  
42  
43  
44  
45  
46  
47  
48  
49  
50

51 From the above findings, it is clear that the level of premature mortality in India is higher  
52 than many developing and developed countries. The level of premature mortality is high not  
53  
54

Formatted: Font: Times New Roman



1  
2  
3  
4  
5  
6  
7 only because of higher under-five mortality but also due to higher adult mortality. While the  
8 existing programme in reduction of under-five mortality should continue, the programme  
9 need to be intensified for reduction of adult mortality. Reduction in adult mortality can be  
10 achieved by increasing budgetary spending for NCDS of central and state government that  
11 would help to intensify efforts on prevention and management of NCDs. Large scale  
12 investment on medical infrastructure for NCDs and increase coverage of health insurance will  
13 be helpful in this direction. The policies to reduce production and consumption of alcohol and  
14 tobacco and creating awareness on healthy life style can reduce the risk factors of NCDs and  
15 avoidable mortality. The programme on NCDs by central government are in place and the  
16 twelfth five year plan made specific provision for management and control of NCDs under  
17 three categories; programmes for life style chronic diseases and risk factor, programmes for  
18 disability prevention and rehabilitation and health promotion and prevention of NCDs [37]  
19 (REF of 12th Five Year working paper). The continuation of maternal and child health  
20 programme and effective implementation of non-communicable diseases can reduce  
21 avoidable mortality in India.  
22  
23  
24  
25  
26  
27  
28  
29  
30  
31  
32  
33  
34

35  
36  
37 The concept of premature mortality has been used as an important measure of health status  
38 and a guide for health policies. The differentials in PYPLL by age groups suggest that the  
39 decline is largely contributed by younger age group, particularly children under five years of  
40 age. Though the overall premature mortality indices and their rates have declined over time,  
41 The decline in premature mortality is largely due to improvement in mortality in the younger  
42 age group e.g. 0-14 years. the age pattern of YPLL, PYPLL and WYPLL reflects increased in  
43 premature mortality among male adults and older population. The decline in premature  
44 mortality is largely due to improvement in mortality in the younger age group e.g. 0-14 years.  
45 Males are experiencing more years of life lost than females. The indices have shown  
46  
47  
48  
49  
50  
51  
52  
53  
54

Formatted: Check spelling and grammar

Field Code Changed

Formatted: Check spelling and grammar

Formatted: Check spelling and grammar

Formatted: Font: Not Bold

Formatted: Font: Times New Roman

1  
2  
3  
4  
5  
6  
7 declining trend for adult females but has increased for males during 1991-2011. Analysis by  
8 causes of death depicts that there are certain diseases which remarkably accounts for more  
9 years of life lost than others. YPLL was highest due to CVD followed by Diarrheal diseases  
10 and Tuberculosis and Respiratory diseases for both male and female. Diarrheal diseases  
11 accounts for highest loss in PYPLL followed by CVD and Accidents for both sex. The CVD  
12 accounts for highest loss in WYPLL both male and female followed by Tuberculosis and  
13 Diarrheal diseases for males and Diarrheal diseases and Malignant and other neoplasm for  
14 females. As most of the CVD deaths are premature and affecting the prime working age  
15 groups, it is timeto invest and devise strategies to combat the non communicable diseases  
16 particularly those are avoidable in working age groups. Diarrheal diseases, Tuberculosis and  
17 Malignant and other neoplasm are the other treats to young population which are  
18 communicable in nature. The dual burden of diseases on India is the root cause of poor health  
19 status of the population as signified by the indices of premature mortality. Therefore, the  
20 increasing share of premature mortality among adults and slower pace of decline in overall  
21 premature mortality during 1991-2011 warrants the urgent need to devise strategies to combat  
22 the dual burden of diseases and save premature deaths in India. Though many new indices  
23 have been developed to measure the premature mortality like DALY (Disability adjusted life  
24 years), HALY (Health adjusted life years), YLL (Years of life lost) etc., these are based on a  
25 number of assumptions and suffers from data limitations in Indian context. On the otherhand,  
26 the YPLL, PYPLL and WYPLL are simple to compute and capture the premature mortality  
27 as it is based on fewer assumptions and data input.

28  
29  
30  
31  
32  
33  
34  
35  
36  
37  
38  
39  
40  
41  
42  
43  
44  
45  
46  
47  
48  
49 This data used is approximately thirteen years old, but since the proportion of death has not  
50 changed significantly, the results are valid and useful in the current scenario. (I will compare  
51 with GBD, 2010)

**Formatted:** Line spacing: Double, Adjust space between Latin and Asian text, Adjust space between Asian text and numbers

**Formatted:** Font: Times New Roman

1  
2  
3  
4  
5  
6  
7  
8  
9  
10  
11  
12  
13  
14  
15  
16  
17  
18  
19  
20  
21  
22  
23  
24  
25  
26  
27  
28  
29  
30  
31  
32  
33  
34  
35  
36  
37  
38  
39  
40  
41  
42  
43  
44  
45  
46  
47

Though many new indices have been developed to measure the premature mortality like DALY (Disability adjusted life years), HALY (Health adjusted life years), YLL (Years of life lost) etc., these are based on a number of assumptions and suffers from data limitations in Indian context. On the otherhand, the YPLL, PYPLL and WYPLL are simple to compute and capture the premature mortality as it is based on fewer assumptions and data input.

Formatted: Line spacing: Double

Formatted: Font: Not Bold

Formatted: Justified, Line spacing: Double

#### Summary box

##### What is already known on this **Subject**?

In last two decades, along with socio-economic development, India has made significant improvement in health outcome. While the life expectancy at birth has increased, the infant mortality rate and child mortality rate has declined across socio-economic groups. The diseases pattern is changing fast and the non-communicable diseases are the leading cause of death in India. The premature mortality is resultant of low child survival and increasing NCDs in India. The demographic and epidemiological transition in India has resulted increase in non-communicable diseases across socio-economic groups and space. Studies suggest increase in premature mortality in prime working age group. A number of indices

Formatted: Line spacing: Multiple 1.15 li

Formatted: Line spacing: 1.5 lines

Formatted: Font: Times New Roman

Formatted: Line spacing: Multiple 1.15 li

1  
2  
3  
4  
5  
6  
7  
8  
9  
10  
11  
12  
13  
14  
15  
16  
17  
18  
19  
20  
21  
22  
23  
24  
25  
26  
27  
28  
29  
30  
31  
32  
33  
34  
35  
36  
37  
38  
39  
40  
41  
42  
43  
44  
45  
46  
47  
48  
49  
50  
51  
52  
53  
54  
55  
56  
57  
58  
59  
60

**What does this study add?**

This study adds to the available literature on premature mortality by providing the standardised estimates of premature mortality by age and sex in India over two decades. It also suggests that the premature mortality is on rise among men in prime working age group. The cardiovascular disease is the leading cause of premature mortality followed by diarrheal diseases.

Formatted: Line spacing: 1.5 lines

**Author's Contribution:** MD and SKM conceptualised the paper, prepared analytical plan and drafted the paper.

**Conflict of Interest:** None

**Funding and Ethical Issues:** It is an independent research and did not receive any funding.

**Data Sharing:** Data used in this paper is available in public domain.

Formatted: Font: Times New Roman

1  
2  
3  
4  
5  
6  
7  
8  
9  
10  
11  
12  
13  
14  
15  
16  
17  
18  
19  
20  
21  
22  
23  
24  
25  
26  
27  
28  
29  
30  
31  
32  
33  
34  
35  
36  
37  
38  
39  
40  
41  
42  
43  
44  
45  
46  
47  
48  
49  
50  
51  
52  
53  
54  
55  
56  
57  
58  
59  
60

~~Author's Contribution: MD conceptualised and prepared tables. MD and SKM prepared analytical plan and drafted the paper.~~

Formatted: Justified, Line spacing: Double

Figure 1: YPLL (in million) for top nine causes of death among adults by sex in India, 2002

Formatted: Font: Not Bold

Figure 2: PYPLL (in million) for top nine causes of death among adults by sex in India, 2002

Formatted: Font: Not Bold

Figure 3: WYPLL (in million) for top nine causes of death among adults by sex in India, 2002

Formatted: Font: Not Bold

Figure 4: Standardised WYPLL by top three diseases and age among males in India, 2002

Formatted: Font: Not Bold

Figure 5: Standardised WYPLL by top three diseases and age among females in India, 2002

Formatted: Font: Not Bold

Formatted: Font: Times New Roman

## References

- 1 WHO. Premature NCD deaths: Situation and trends. Geneva: World Health Organisation 2014.
- 2 Joshi R, Cardona M, Iyengar S, *et al*. Chronic diseases now a leading cause of death in rural India--mortality data from the Andhra Pradesh Rural Health Initiative. *International journal of epidemiology* 2006;**35**:1522-9.
- 3 Quigley MA. Commentary: shifting burden of disease--epidemiological transition in India. *International journal of epidemiology* 2006;**35**:1530-1.
- 4 Upadhyay RP. An overview of the burden of non-communicable diseases in India. *Iranian journal of public health* 2012;**41**:1-8.
- 5 Goyal A, Yusuf S. The burden of cardiovascular disease in the Indian subcontinent. *The Indian journal of medical research* 2006;**124**:235-44.
- 6 Bloom DE, Canning D. Health and Economic Growth: Reconciling the Micro and Macro Evidence. *CDDRL WORKING PAPERS*. Stanford: Stanford University 2005.
- 7 Bloom DE, Canning D, Sevilla J. The Effect of Health on Economic Growth: A Production Function Approach. *World Development* 2004;**32**:1-13.
- 8 Mahal A. The poor and health service use in India. *Health, Nutrition and Population (HNP) Discussion Paper*. The World Bank: Washington, DC 2001.
- 9 Dempsey M. Decline in tuberculosis: the death rate fails to tell the entire story. *Am Rev Tuberculosis* 1947;**56**:157-64.
- 10 Scanlon WJ. A Health Status Indicator for Targeting Federal Aid to States. In: Fastrup J, ed. *Report to the Chairman, Committee on Labor and Human Resources, US Senate*. USA: United States General Accounting Office 1996.
- 11 Gardner JW, Sanborn JS. Years of potential life lost (YPLL)--what does it measure? *Epidemiology (Cambridge, Mass)* 1990;**1**:322-9.
- 12 Romeder JM, McWhinnie JR. Potential years of life lost between ages 1 and 70: an indicator of premature mortality for health planning. *International journal of epidemiology* 1977;**6**:143-51.
- 13 OECD. Premature mortality. *Health at a Glance 2011: OECD Indicators*. OECD Publishing: Organisation of Economic Cooperation and Development 2011.
- 14 Krieger N, Rehkopf DH, Chen JT, *et al*. The Fall and Rise of US Inequities in Premature Mortality: 1960-2002. *PLoS Med* 2008;**5**:e46.
- 15 Cheng ER, Kindig DA. Disparities in Premature Mortality Between High- and Low-Income US Counties. *Prev Chronic Dis* 2012;**9**.
- 16 RGI. SRS Based Abridged Life Tables 2003-07 to 2006-10 In: General R, ed. *SRS Analytical Studies*. New Delhi: Registrar General & Census Commissioner 2012.
- 17 Ram U, Jha P, Ram F, *et al*. Neonatal, 1-59 month, and under-5 mortality in 597 Indian districts, 2001 to 2012: estimates from national demographic and mortality surveys. *The Lancet Global Health* 2013;**1**:e219-e26.
- 18 UN. World Population Prospects: The 2012 Revision. In: Population Division DoEaSA, ed. New York: United Nations 2014.
- 19 Dubey M. Trends and prospects of adult mortality by cause of death in India. Mumbai: International Institute for Population Sciences 2013:117.
- 20 JS Thakur SP, Charu C. Garg, Shanthi Mendis and Nata Menabde. Social and Economic Implications of Noncommunicable diseases in India. *Indian Journal of Community Medicine* 2011;**36(Suppl1)**:13-22.
- 21 Srivastava A, Mohanty SK. Age and sex pattern of cardiovascular mortality, hospitalisation and associated cost in India. *PLoS one* 2013;**8**:e62134.

- 1  
2  
3  
4  
5  
6  
7 22 K Srinath Reddy BS, Cherian Varghese, and Anbumani Ramadoss. Responding to the  
8 threat of chronic diseases in India. *Lancet* 2005;**366**:1744-9.  
9 23 Saikia N, Jasilionis D, Ram F, *et al.* Trends and geographic differentials in mortality  
10 under age 60 in India. *Population studies* 2011;**65**:73-89.  
11 24 Dubey M. Trends and prospects of adult mortality in India. Mumbai: International  
12 Institute for Population Sciences 2013:117.  
13 25 Singh A, Ladusingh L. Increasing life expectancy and convergence of age at death in  
14 India. *GENUS* 2013;**69**:83-9.  
15 26 Yadav A, Yadav S, Kesarwani R. Decelerating Mortality Rates in Older Ages and its  
16 Prospects through Lee-Carter Approach. *PloS one* 2012;**7**:e50941.  
17 27 RGI. Report on Cause of Death in India 2001-2003. Office of the Registrar General of  
18 India 2009.  
19 28 Census. Census of India 2011. New Delhi: Registrar General & Census  
20 Commissioner. 2011.  
21 29 Census. Census of India 2001. New Delhi: Registrar General & Census  
22 Commissioner. 2001.  
23 30 Census. Census of India 1991. New Delhi: Registrar General & Census  
24 Commissioner. 1991.  
25 31 RGI. Sample Registration System Statistical Report (for the year 1991-2011). New  
26 Delhi: Office of The Registrar General, Ministry of Home Affairs, Government of India  
27 32 India RGo. Vital Statistics of India Based on the Civil Registration System 2010. New  
28 Delhi: Office of the Registrar General of India, Ministry of Home Affairs, Government of  
29 India 2013.  
30 33 RGI. Report on Medical Certification of Cause of Death, 2010. New Delhi 2014.  
31 34 Mohanty SK. Multidimensional Poverty and Child Survival in India. *PloS one*  
32 2011;**6**:e26857.  
33 35 Saikia N, Singh A, Jasilionis D, *et al.* Explaining the rural-urban gap in infant  
34 mortality in India. *Demographic Research* 2013;**29**:473-506.  
35 36 Singh A, Pathak PK, Chauhan RK, *et al.* Infant and Child Mortality in India in the  
36 Last Two Decades: A Geospatial Analysis. *PloS one* 2011;**6**:e26856.  
37 37 Planning Commission. Report of the Working Group on Disease Burden for 12th Five  
38 Year Plan. New Delhi: Planning Commission of India, Government of India 2011.  
39  
40  
41  
42  
43  
44  
45  
46  
47  
48  
49  
50  
51  
52  
53  
54  
55

1  
2  
3  
4  
5  
6  
7  
8  
9  
10  
11  
12  
13  
14  
15  
16  
17  
18  
19  
20  
21  
22  
23  
24  
25  
26  
27  
28  
29  
30  
31  
32  
33  
34  
35  
36  
37  
38  
39  
40  
41  
42  
43  
44  
45  
46  
47  
48  
49  
50  
51  
52  
53  
54  
55  
56  
57  
58  
59  
60

For peer review

**Figure 1: YPLL (in million) for top nine causes of death among adults by sex, India, 2002**

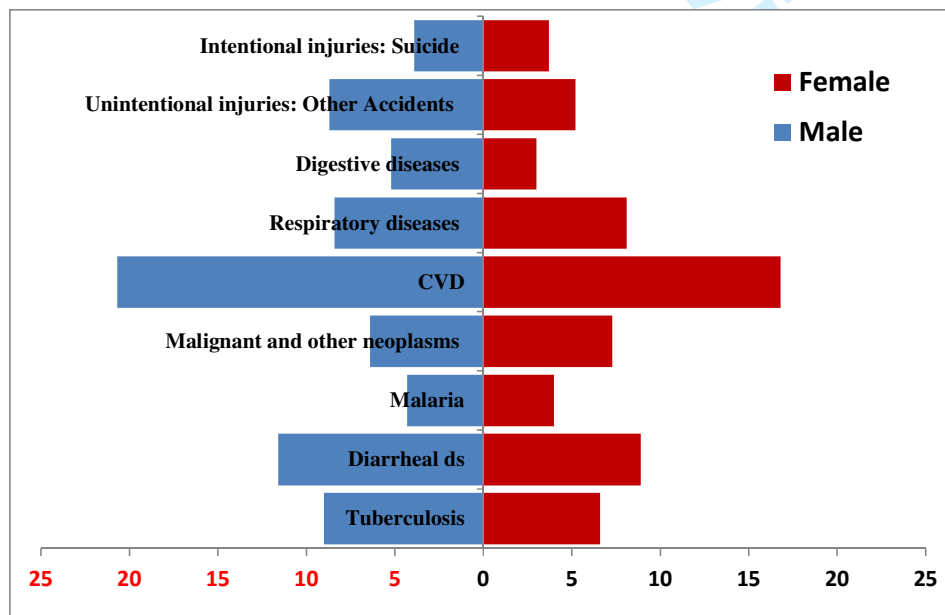

Formatted: Font: Times New Roman

31



1  
2  
3  
4  
5  
6  
7  
8  
9  
10  
11  
12  
13  
14  
15  
16  
17  
18  
19  
20  
21  
22  
23  
24  
25  
26  
27  
28  
29  
30  
31  
32  
33  
34  
35  
36  
37  
38  
39  
40  
41  
42  
43  
44  
45  
46  
47  
48  
49  
50  
51  
52  
53  
54  
55  
56  
57  
58  
59  
60

Figure 2: PYPLL (in million) for top nine causes of death among adults by sex, India, 2002

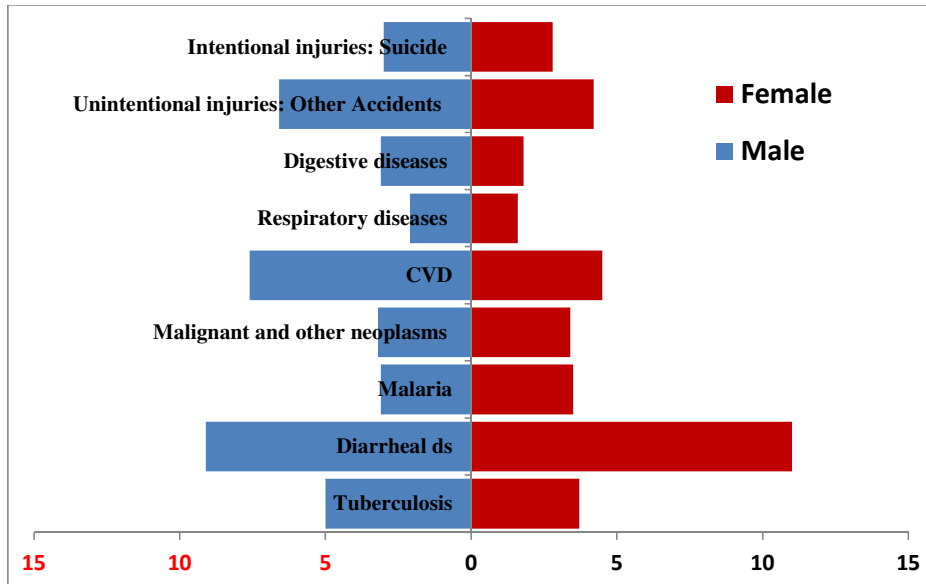

Figure 3: WYPLL (in million) for top nine causes of death among adults by sex, in India, 2002

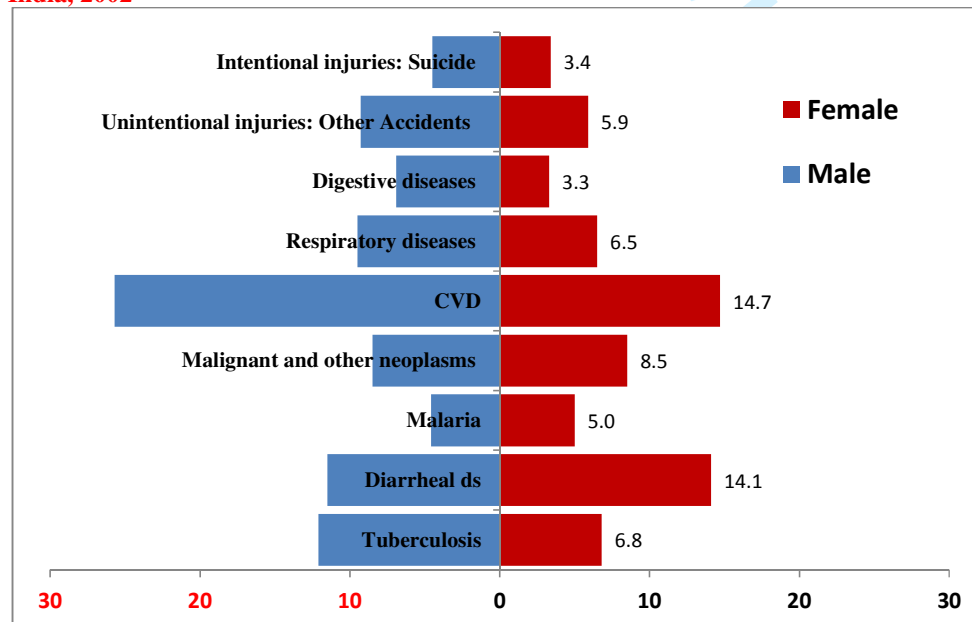

Formatted: Font: Times New Roman

32

Figure 4: Standardised WYPLL due to by top three diseases by and age, among Mmale,s in India, 2002

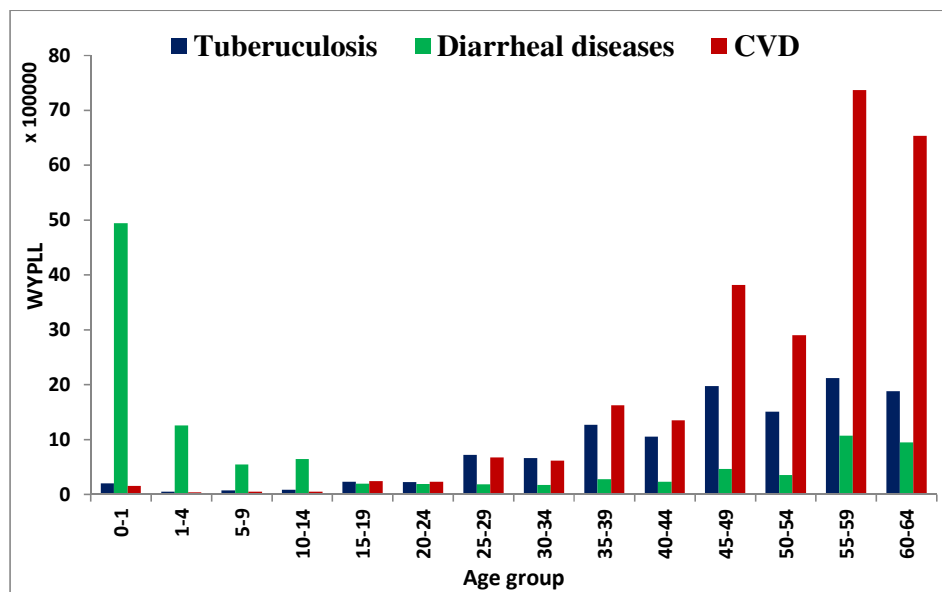

Review only

Formatted: Font: Times New Roman

1  
2  
3  
4  
5  
6  
7  
8  
9  
10  
11  
12  
13  
14  
15  
16  
17  
18  
19  
20  
21  
22  
23  
24  
25  
26  
27  
28  
29  
30  
31  
32  
33  
34  
35  
36  
37  
38  
39  
40  
41  
42  
43  
44  
45  
46  
47  
48  
49  
50  
51  
52  
53  
54  
55  
56  
57  
58  
59  
60

**Figure 5: Standardised WYPLL due to by top three diseases by and age, among Females in , India, 2002**

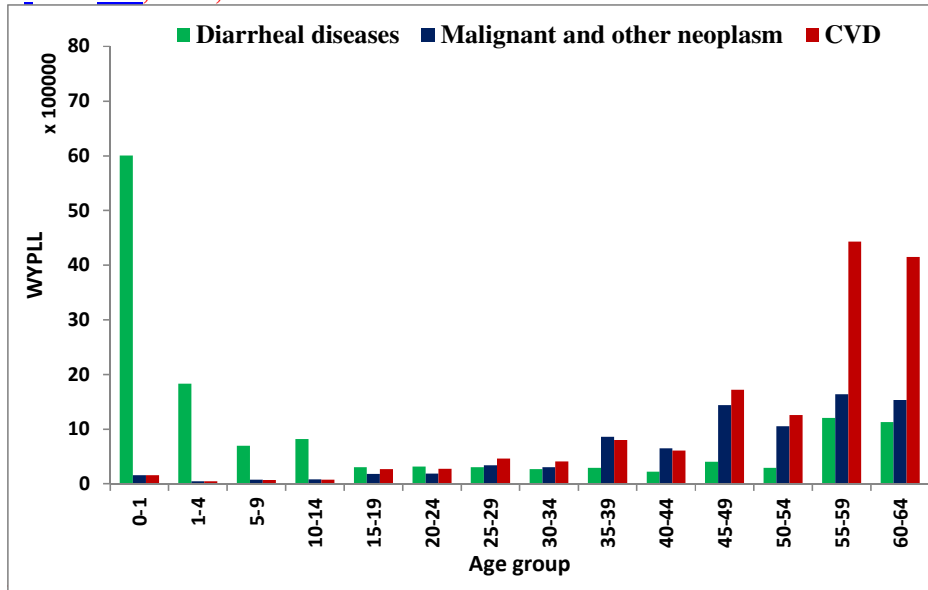

review only

Formatted: Font: Times New Roman

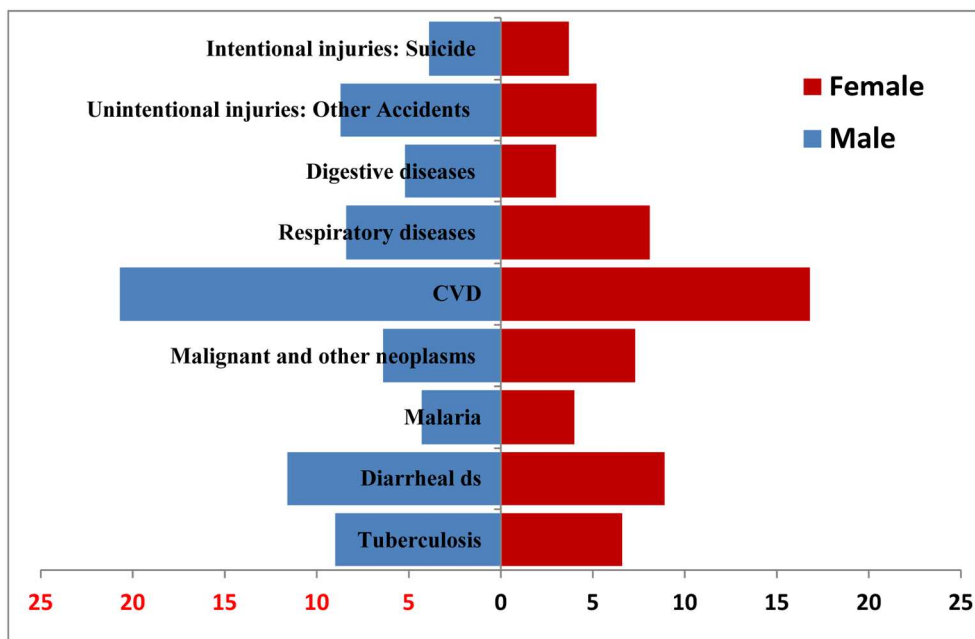

Figure 1: YPLL (in million) for top nine causes of death among adults by sex in India, 2002  
147x96mm (300 x 300 DPI)

Review only

1  
2  
3  
4  
5  
6  
7  
8  
9  
10  
11  
12  
13  
14  
15  
16  
17  
18  
19  
20  
21  
22  
23  
24  
25  
26  
27  
28  
29  
30  
31  
32  
33  
34  
35  
36  
37  
38  
39  
40  
41  
42  
43  
44  
45  
46  
47  
48  
49  
50  
51  
52  
53  
54  
55  
56  
57  
58  
59  
60

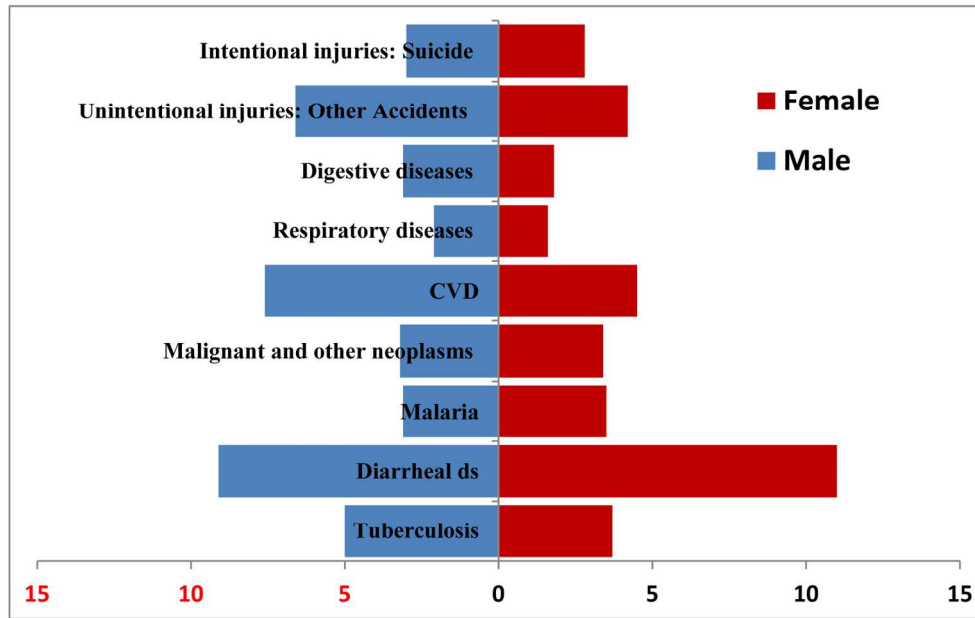

Figure 2: PYPLL (in million) for top nine causes of death among adults by sex in India, 2002  
144x90mm (300 x 300 DPI)

Review only

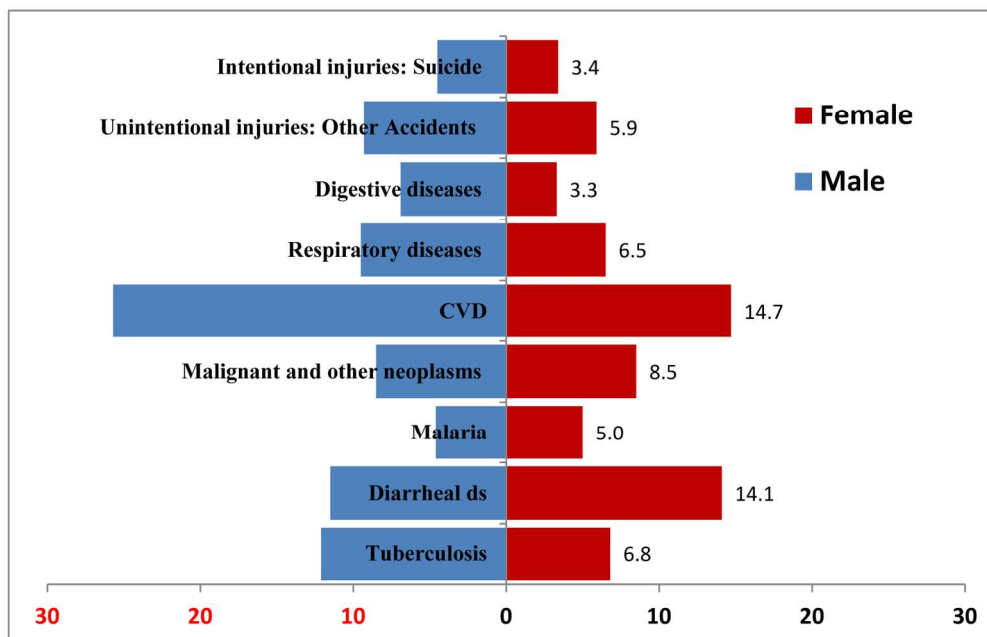

Figure 3: WYPLL (in million) for top nine causes of death among adults by sex in India, 2002  
149x96mm (300 x 300 DPI)

Review only

1  
2  
3  
4  
5  
6  
7  
8  
9  
10  
11  
12  
13  
14  
15  
16  
17  
18  
19  
20  
21  
22  
23  
24  
25  
26  
27  
28  
29  
30  
31  
32  
33  
34  
35  
36  
37  
38  
39  
40  
41  
42  
43  
44  
45  
46  
47  
48  
49  
50  
51  
52  
53  
54  
55  
56  
57  
58  
59  
60

1  
2  
3  
4  
5  
6  
7  
8  
9  
10  
11  
12  
13  
14  
15  
16  
17  
18  
19  
20  
21  
22  
23  
24  
25  
26  
27  
28  
29  
30  
31  
32  
33  
34  
35  
36  
37  
38  
39  
40  
41  
42  
43  
44  
45  
46  
47  
48  
49  
50  
51  
52  
53  
54  
55  
56  
57  
58  
59  
60

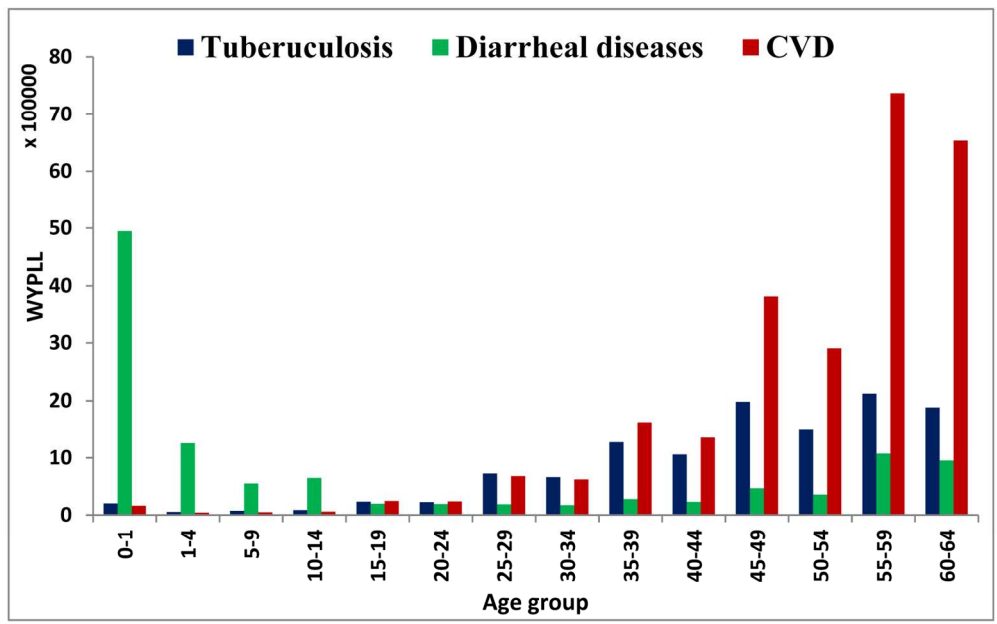

Figure 4: Standardised WYPLL by top three diseases and age among males in India, 2002  
146x92mm (300 x 300 DPI)

review only

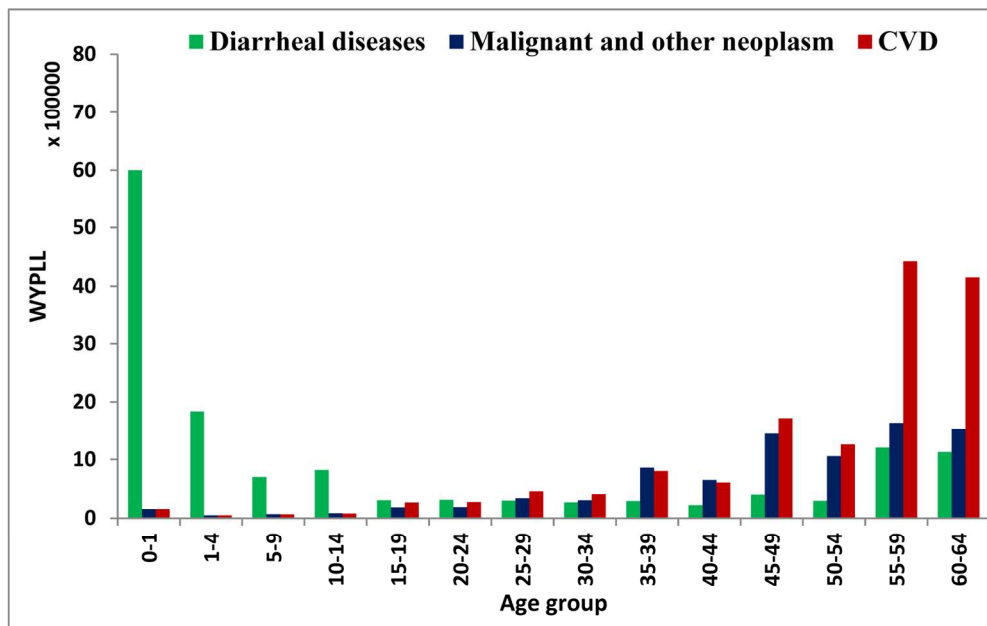

Figure 5: Standardised WYPLL by top three diseases and age among females in India, 2002  
143x91mm (300 x 300 DPI)

Review only



**Appendix 1: Estimated population and number of deaths (in 000's) among male in India, 1991-11**

| Age group    | 1991          |             | 1996          |             | 2001          |             | 2006          |             | 2011          |             |
|--------------|---------------|-------------|---------------|-------------|---------------|-------------|---------------|-------------|---------------|-------------|
|              | Population    | Deaths      |
| <b>0-1</b>   | 9544          | 1098        | 11404         | 936         | 8648          | 875         | 12053         | 750         | 10672         | 501         |
| <b>1-4</b>   | 42816         | 318         | 43999         | 305         | 48471         | 250         | 47173         | 195         | 48171         | 106         |
| <b>5-9</b>   | 57419         | 134         | 63592         | 127         | 66735         | 100         | 66701         | 93          | 66537         | 67          |
| <b>10-14</b> | 51948         | 70          | 58775         | 71          | 65633         | 74          | 67851         | 67          | 69664         | 49          |
| <b>15-19</b> | 42231         | 79          | 47212         | 71          | 53940         | 82          | 58076         | 84          | 64207         | 77          |
| <b>20-24</b> | 37514         | 92          | 43840         | 92          | 46321         | 100         | 56351         | 112         | 57787         | 98          |
| <b>25-29</b> | 34547         | 89          | 39504         | 101         | 41558         | 115         | 45426         | 110         | 51527         | 108         |
| <b>30-34</b> | 29918         | 98          | 34687         | 109         | 37362         | 127         | 43701         | 134         | 44822         | 130         |
| <b>35-39</b> | 27558         | 109         | 30833         | 108         | 36039         | 155         | 36801         | 150         | 43076         | 159         |
| <b>40-44</b> | 22842         | 127         | 26015         | 149         | 29879         | 163         | 34501         | 185         | 37681         | 200         |
| <b>45-49</b> | 18955         | 178         | 20716         | 173         | 24868         | 199         | 25875         | 193         | 32255         | 232         |
| <b>50-54</b> | 16905         | 212         | 17343         | 225         | 19852         | 231         | 22425         | 240         | 25937         | 267         |
| <b>55-59</b> | 10942         | 264         | 12526         | 230         | 13583         | 283         | 18400         | 282         | 19527         | 307         |
| <b>60-64</b> | 11907         | 326         | 12044         | 361         | 13586         | 329         | 15525         | 386         | 18770         | 447         |
| <b>65-69</b> | 6494          | 359         | 8190          | 353         | 9472          | 442         | 10350         | 393         | 12992         | 521         |
| <b>70+</b>   | 10963         | 835         | 10599         | 974         | 14710         | 1012        | 14950         | 1252        | 19498         | 1705        |
| <b>Total</b> | <b>432503</b> | <b>4388</b> | <b>481277</b> | <b>4385</b> | <b>530656</b> | <b>4538</b> | <b>576160</b> | <b>4626</b> | <b>623122</b> | <b>4973</b> |

**Appendix 2: Estimated population and number of deaths (in 000's) among female in India, 1991-11**

| Age group    | 1991          |             | 1996          |             | 2001          |             | 2006          |             | 2011          |             |
|--------------|---------------|-------------|---------------|-------------|---------------|-------------|---------------|-------------|---------------|-------------|
|              | Population    | Deaths      |
| <b>0-1</b>   | 8964          | 1040        | 10489         | 836         | 7913          | 840         | 11132         | 678         | 63506         | 483         |
| <b>1-4</b>   | 41053         | 458         | 40030         | 433         | 45414         | 329         | 43370         | 232         | 56734         | 161         |
| <b>5-9</b>   | 53876         | 154         | 58119         | 151         | 61582         | 111         | 60977         | 93          | 54021         | 61          |
| <b>10-14</b> | 46744         | 71          | 52308         | 70          | 59214         | 68          | 60438         | 62          | 50241         | 44          |
| <b>15-19</b> | 36804         | 100         | 41131         | 82          | 46276         | 95          | 51264         | 85          | 44086         | 79          |
| <b>20-24</b> | 36958         | 116         | 41578         | 114         | 43443         | 112         | 53422         | 110         | 42368         | 86          |
| <b>25-29</b> | 34693         | 103         | 38895         | 101         | 41865         | 111         | 44249         | 89          | 35014         | 75          |
| <b>30-34</b> | 28487         | 88          | 34425         | 95          | 36912         | 95          | 43709         | 91          | 30285         | 71          |
| <b>35-39</b> | 24841         | 85          | 27719         | 81          | 34535         | 103         | 33996         | 84          | 23307         | 72          |
| <b>40-44</b> | 19714         | 87          | 23695         | 92          | 25860         | 92          | 32377         | 97          | 19759         | 88          |
| <b>45-49</b> | 17179         | 101         | 18330         | 100         | 22541         | 111         | 20506         | 87          | 19029         | 112         |
| <b>50-54</b> | 14209         | 131         | 16095         | 149         | 16736         | 132         | 26441         | 163         | 13559         | 140         |
| <b>55-59</b> | 10531         | 168         | 12518         | 165         | 14070         | 191         | 16189         | 172         | 24392         | 184         |
| <b>60-64</b> | 10842         | 231         | 12518         | 281         | 13930         | 248         | 15649         | 289         | 15316         | 306         |
| <b>65-69</b> | 6365          | 277         | 8494          | 276         | 10335         | 346         | 10253         | 290         | 11912         | 362         |
| <b>70+</b>   | 10111         | 677         | 11177         | 883         | 14589         | 504         | 15649         | 2042        | 20378         | 1459        |
| <b>Total</b> | <b>401370</b> | <b>3887</b> | <b>447520</b> | <b>3909</b> | <b>495216</b> | <b>3487</b> | <b>539621</b> | <b>4664</b> | <b>523909</b> | <b>3783</b> |

## Research Checklist

1. Title
2. Abstract
  - Objectives
  - Setting
  - Participants
  - Primary and secondary outcome measures
  - Results
  - Conclusion
3. Keywords
4. Strengths and limitation of the studies
5. Introduction
6. Data and Methods
  - Ethical issue
  - Census of India
  - Sample Registration System (SRS)
  - Report on Causes of death, 2001-03
  - Years of potential life lost (PYLL) and its standardization
  - Premature years of potential life lost (PYPLL) and its standardization
  - Working years of potential life lost (WYPLL) and its standardization
7. Results
  - Indices of premature mortality, 1991-2011: YPLL, PYPLL and WYPLL
  - YPLL, PYPLL and WYPLL by causes of death
  - Output in tabular form
8. Discussion and Conclusion
9. Summary box
  - What is already known on this subject?
  - What does this study add?
10. Author's contribution
11. Conflict of Interest
12. Funding and Ethical Issues
13. Data Sharing

14. References

For peer review only

1  
2  
3  
4  
5  
6  
7  
8  
9  
10  
11  
12  
13  
14  
15  
16  
17  
18  
19  
20  
21  
22  
23  
24  
25  
26  
27  
28  
29  
30  
31  
32  
33  
34  
35  
36  
37  
38  
39  
40  
41  
42  
43  
44  
45  
46  
47  
48  
49  
50  
51  
52  
53  
54  
55  
56  
57  
58  
59  
60
